# Supplementary material
Source: PubMed Central journal article supplement (PMC3703769)

## Supporting Information

### Anti-tuberculosis Cycloartane Triterpenoids from *Radermachera boniana*

Ngan B. Truong,<sup>†</sup> Cuong V. Pham,<sup>†,\*</sup> Huong T. M. Doan,<sup>†</sup> Hung V. Nguyen,<sup>†</sup> Cuong M. Nguyen,<sup>‡</sup> Hiep T. Nguyen,<sup>§</sup> Hong-jie Zhang,<sup>⊥</sup> Harry H. S. Fong,<sup>⊥</sup> Scott G. Franzblau,<sup>||</sup> Djaja D. Soejarto,<sup>⊥</sup> and Minh V. Chau<sup>†,\*</sup>

<sup>†</sup>Institute of Marine Biochemistry of the Vietnam Academy of Science and Technology (VAST),  
18 Hoang Quoc Viet road, Cau Giay, Hanoi, Vietnam,

<sup>‡</sup> Cuc Phuong National Park, Nho Quan, Ninh Binh, Vietnam,

<sup>§</sup> Institute of Ecology and Biological Resources of the Vietnam Academy of Science and  
Technology, 18 Hoang Quoc Viet road, Cau Giay, Hanoi, Vietnam,

<sup>⊥</sup> Department of Medicinal Chemistry and Pharmacognosy, University of Illinois at Chicago,  
Chicago, IL 60612-7231, USA,

<sup>||</sup> Institute for Tuberculosis Research, University of Illinois at Chicago, Chicago, IL 60612-7231,  
USA

\* Corresponding authors: phamvc@ich.vast.ac.vn; cvminh@vast.ac.vn

## Table of Contents

|     |                                                                                          |     |
|-----|------------------------------------------------------------------------------------------|-----|
| 1.  | General .....                                                                            | S3  |
| 2.  | Plant material .....                                                                     | S3  |
| 3.  | Bioassays .....                                                                          | S3  |
| 4.  | <sup>1</sup> H NMR spectrum of bonianic acid A (1) .....                                 | S5  |
| 5.  | <sup>13</sup> C NMR and DEPT spectra of bonianic acid A (1) .....                        | S6  |
| 6.  | <sup>1</sup> H- <sup>1</sup> H COSY spectrum of bonianic acid A (1) .....                | S7  |
| 7.  | HSQC spectrum of bonianic acid A (1) .....                                               | S8  |
| 8.  | HMBC spectrum of bonianic acid A (1) .....                                               | S9  |
| 9.  | NOESY spectrum of bonianic acid A (1) .....                                              | S10 |
| 10. | Positive HRESI mass spectrum of bonianic acid A (1) .....                                | S11 |
| 11. | <sup>1</sup> H NMR spectrum of bonianic acid B (2) .....                                 | S12 |
| 12. | <sup>13</sup> C NMR and DEPT spectra of bonianic acid B (2) .....                        | S13 |
| 13. | <sup>1</sup> H- <sup>1</sup> H COSY spectrum of bonianic acid B (2) .....                | S14 |
| 14. | HSQC spectrum of bonianic acid B (2) .....                                               | S15 |
| 14. | HMBC spectrum of bonianic acid B (2) .....                                               | S16 |
| 15. | NOESY spectrum of bonianic acid B (2) .....                                              | S17 |
| 16. | Negative HRESI mass spectrum of bonianic acid B (2).....                                 | S18 |
| 17. | <sup>1</sup> H NMR spectrum of 3- <i>O</i> -acetyluncaric acid (3) .....                 | S19 |
| 18. | <sup>13</sup> C NMR and DEPT spectra of 3- <i>O</i> -acetyluncaric acid (3).....         | S20 |
| 19. | <sup>1</sup> H- <sup>1</sup> H COSY spectrum of 3- <i>O</i> -acetyluncaric acid (3)..... | S21 |
| 20. | HSQC spectrum of 3- <i>O</i> -acetyluncaric acid (3).....                                | S22 |
| 21. | HMBC spectrum of 3- <i>O</i> -acetyluncaric acid (3).....                                | S23 |
| 22. | NOESY spectrum of 3- <i>O</i> -acetyluncaric acid (3).....                               | S24 |
| 23. | Positive HRESI mass spectrum of 3- <i>O</i> -acetyluncaric acid (3) .....                | S25 |

## General

Optical rotation was recorded on a Polax-2L polarimeter in  $\text{CHCl}_3$ . Melting points were recorded on a Buchi B-545 instrument and IR spectra were measured on a Nicolet Impact-410 FT-IR spectrometer. High resolution mass spectra were measured on a VARIAN 910 spectrometer, while the  $^{13}\text{C}$  NMR spectra were recorded on a Bruker 500.13 MHz spectrometer operating at 125.76 MHz.  $^1\text{H}$  and 2D NMR spectra were recorded on a Bruker 500.13 MHz spectrometer operating at 500.13 MHz.  $^1\text{H}$  chemical shifts were referenced to  $\text{CHCl}_3$  and  $\text{CD}_3\text{OD}$  at 7.27 ppm and 3.33 ppm, respectively, while the  $^{13}\text{C}$  chemical shifts were referenced to the central peak of  $\text{CDCl}_3$  at 77.0 ppm and 49.0 ppm for  $\text{CD}_3\text{OD}$ . For HMBC experiments the delay ( $1/2J$ ) was 70 ms and for the NOESY experiments the mixing time was 150 ms.

## Plant material

Leaf and twig sample SVA2933 of *R. boniana* was collected in Cuc Phuong National Park in April 2007, from the same location,  $20^\circ 17.901''$  N,  $105^\circ 39.310''$  E) where the original primary active sample (SV2933) was collected in 2002. A voucher herbarium specimen of the recollected sample (*Mai Van Xinh 1226*) and that of the primary sample (*Ma Van Xinh 595*) have been deposited at each of the following institutions: Cuc Phuong National Park Herbarium (CPNP) in Nho Quan, Ninh Binh, Vietnam; Herbarium of the Department of Botany (HN) of the Vietnam Academy of Science and Technology, Hanoi, Vietnam; and at the J.D. Searle Herbarium of the Field Museum (F), Chicago, USA.

## Bioassays

The virulent  $\text{H}_{37}\text{Rv}$  strain of *M. tuberculosis* (ATCC 27294, American Type Culture Collection, Rockville, MD) was used for the anti-TB bioassay.<sup>14a,b</sup> The test materials were dissolved in DMSO at 10 mg/mL and tested in a series of 2-fold dilutions with the highest concentration of 100  $\mu\text{g/mL}$  (and 1% v/v DMSO). Samples were incubated for 7 days with *M. tuberculosis* in a 96-well plates, and then cell growth was determined using the Alamar Blue dye with fluorometric detection. The MIC was defined as the lowest concentration resulting in ninety percent or greater inhibition of fluorescence compared to bacteria-only controls. Rifampin was used as a positive control, exhibiting a MIC of 0.12  $\mu\text{g/mL}$ , while DMSO at a final concentration of 1% v/v was the negative control. Cytotoxicity for green monkey kidney (VERO) cells was

determined following 72 hrs exposure.<sup>14b</sup> Viability was assessed on the basis of cellular conversion of MTS into a soluble formazan product using the Promega CellTiter 96 Aqueous Non-Radioactive Cell Proliferation Assay.

<sup>1</sup>H NMR spectrum (500.13 MHz, CDCl<sub>3</sub>) of bonianic acid A (1)

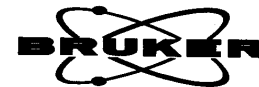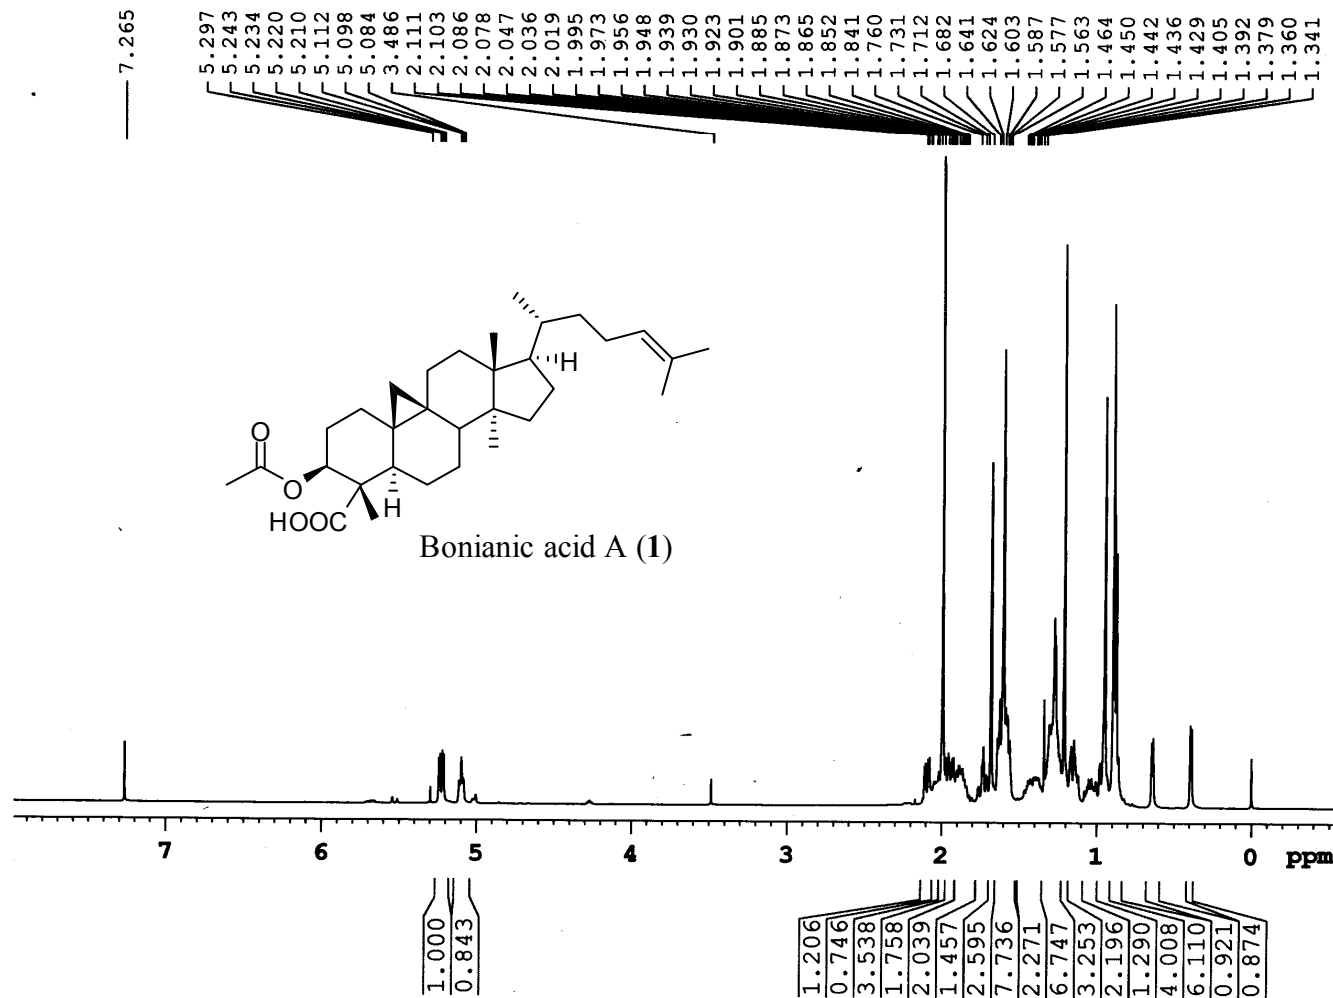

Current Data Parameters  
 NAME 2NGANHUNGRADERF423  
 EXPNO 1  
 PROCNO 1

F2 - Acquisition Parameters  
 Date\_ 20090525  
 Time 16.37  
 INSTRUM av500  
 PROBHD 5 mm Multinucl  
 PULPROG zg30  
 TD 65536  
 SOLVENT CDCl3  
 NS 16  
 DS 0  
 SWH 10000.000 Hz  
 FIDRES 0.152588 Hz  
 AQ 3.2769001 sec  
 RG 45.3  
 DW 50.000 usec  
 DE 6.00 usec  
 TE 301.7 K  
 D1 1.00000000 sec  
 MCREST 0.00000000 sec  
 MCWRK 0.01500000 sec

----- CHANNEL f1 -----  
 NUC1 1H  
 P1 10.50 usec  
 PL1 -3.00 dB  
 SF01 500.1335009 MHz

F2 - Processing parameters  
 SI 32768  
 SF 500.1300109 MHz  
 WDW EM  
 SSB 0  
 LB 0.30 Hz  
 GB 0  
 PC 1.00

<sup>13</sup>C NMR and DEPT spectra (125.76 MHz, CDCl<sub>3</sub>) of bonianic acid A (1)

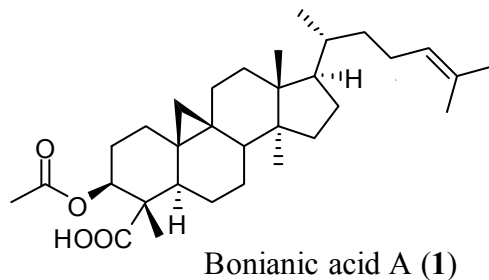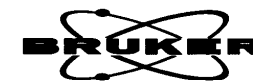

DEPT90

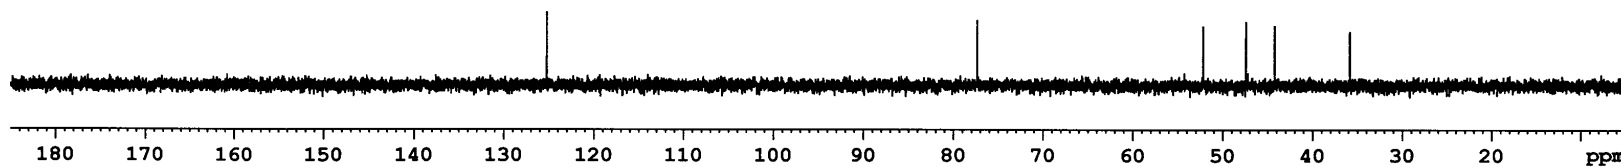

DEPT135

*CH&CH<sub>3</sub>*

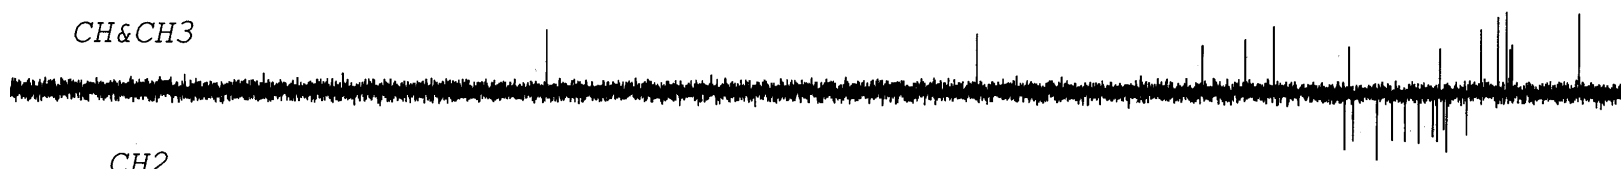

*CH<sub>2</sub>*

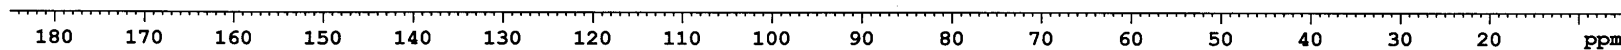

C13CPD

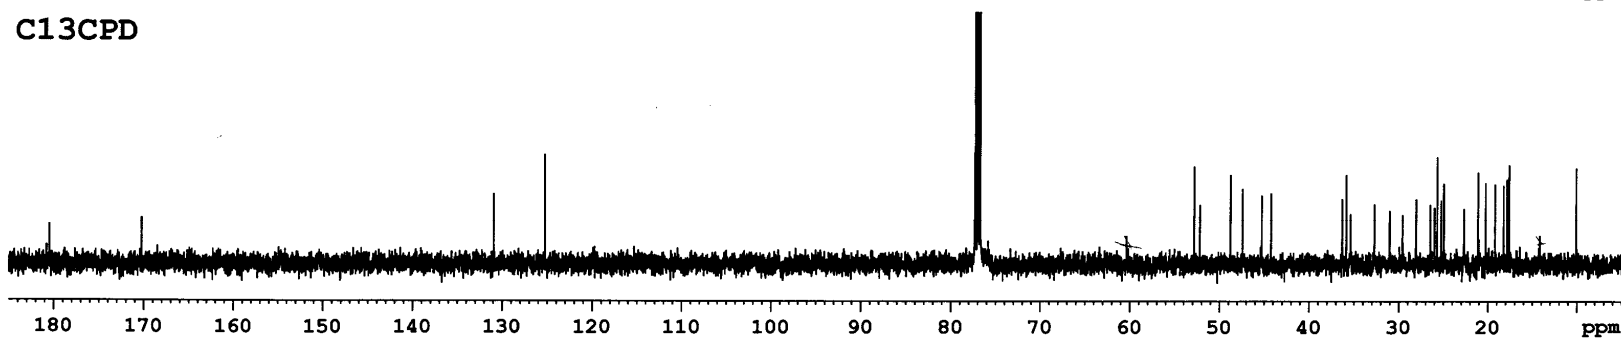

$^1\text{H}$ - $^1\text{H}$  COSY spectrum (500.13 MHz,  $\text{CDCl}_3$ ) of bonianic acid A (1)

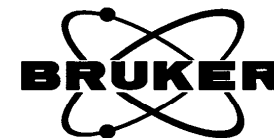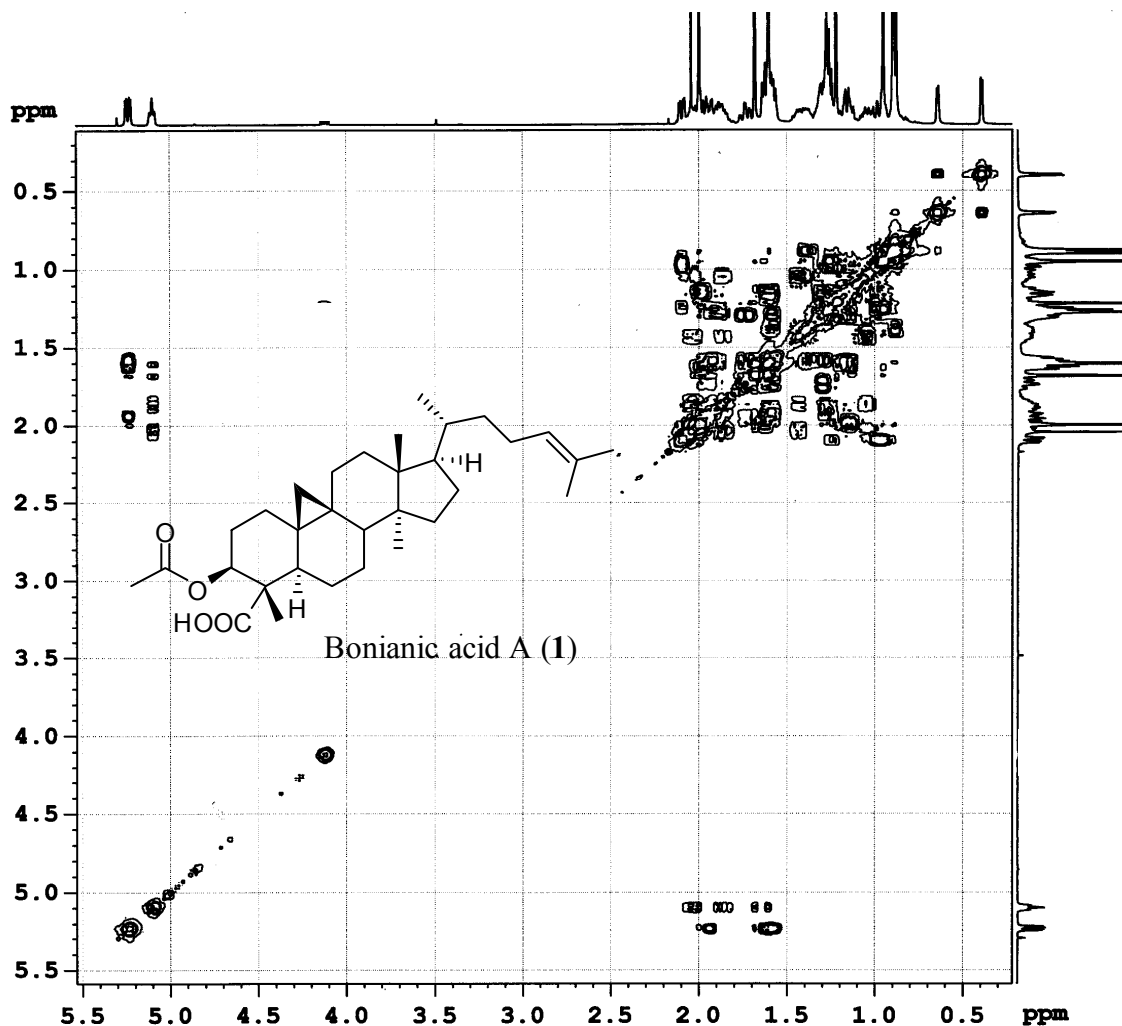

Current Data Parameters  
 NAME 2L.HUNG\_RaderFl19  
 EXPNO 7  
 PROCNO 1

F2 - Acquisition Parameter  
 Date 20070727  
 Time 15.39  
 INSTRUM av500  
 PROBHD 5 mm Multinucl  
 PULPROG cosygpgf  
 TD 2048  
 SOLVENT  $\text{CDCl}_3$   
 NS 4  
 DS 8  
 SWH 5000.000 Hz  
 FIDRES 2.441406 Hz  
 AQ 0.2049500 se  
 RG 71.8  
 DW 100.000 us  
 DE 6.00 us  
 TE 300.6 K  
 d0 0.00000300 se  
 D1 1.48689198 se  
 d13 0.00000400 se  
 D16 0.00015000 se  
 INO 0.00020000 se  
 MCREST 0.00000000 se  
 MCWRK 1.48689198 se

----- CHANNEL f1 -----  
 NUC1  $^1\text{H}$   
 P0 10.50 us  
 P1 10.50 us  
 PL1 -3.00 dE  
 SF01 500.1322506 MH

----- GRADIENT CHANNEL -----  
 GPNAM1 SINE.100  
 GPNAM2 SINE.100  
 GPX1 0.00 %  
 GPX2 0.00 %  
 GPY1 0.00 %  
 GPY2 0.00 %  
 GPZ1 10.00 %  
 GPZ2 10.00 %  
 P16 1000.00 us

F1 - Acquisition parameter  
 NDO 1  
 TD 160  
 SF01 500.1323 MH  
 FIDRES 31.250000 Hz  
 SW 9.997 pp  
 FMODE QF

F2 - Processing parameters  
 SI 1024  
 SF 500.1300133 MH  
 WDW SINE  
 SSB 0  
 LB 0.00 Hz  
 GB 0  
 PC 1.00

HSQC spectrum ( $^1\text{H}$ : 500.13 MHz,  $^{13}\text{C}$ : 125.76 MHz,  $\text{CDCl}_3$ )  
of bonianic acid A (1)

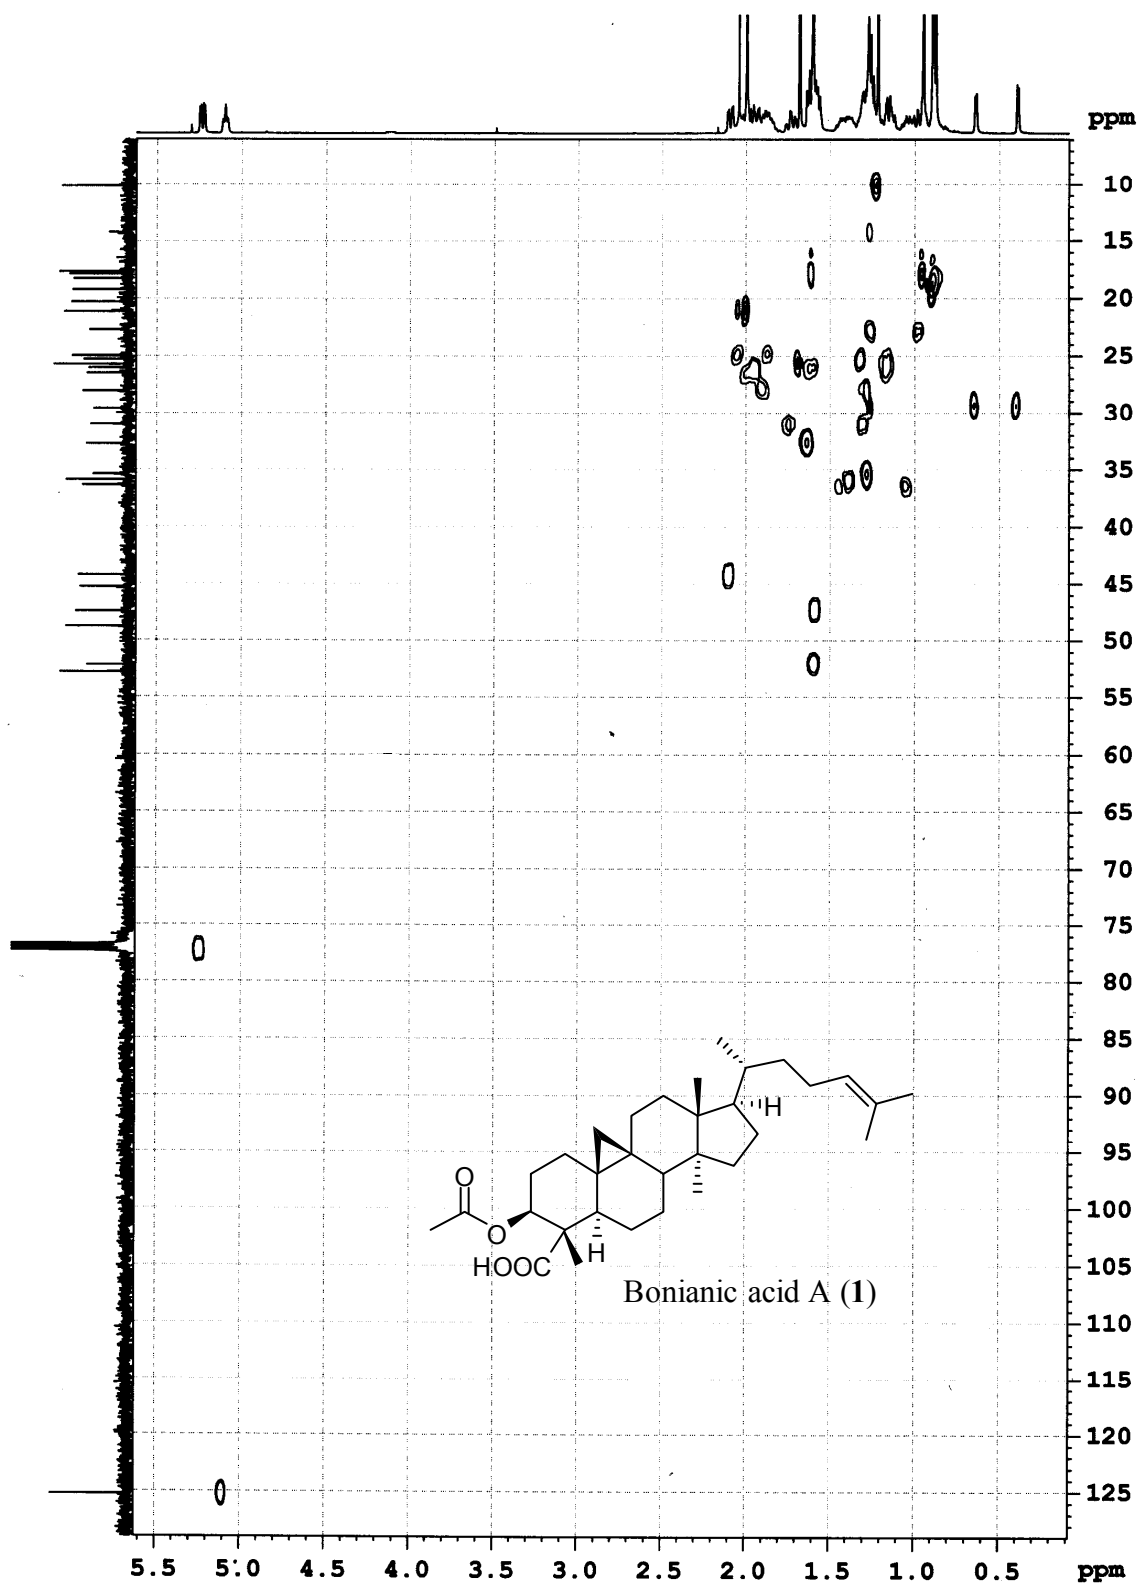



HMBC spectrum ( $^1\text{H}$ : 500.13 MHz,  $^{13}\text{C}$ : 125.76 MHz,  $\text{CDCl}_3$ )  
of bonianic acid A (1)

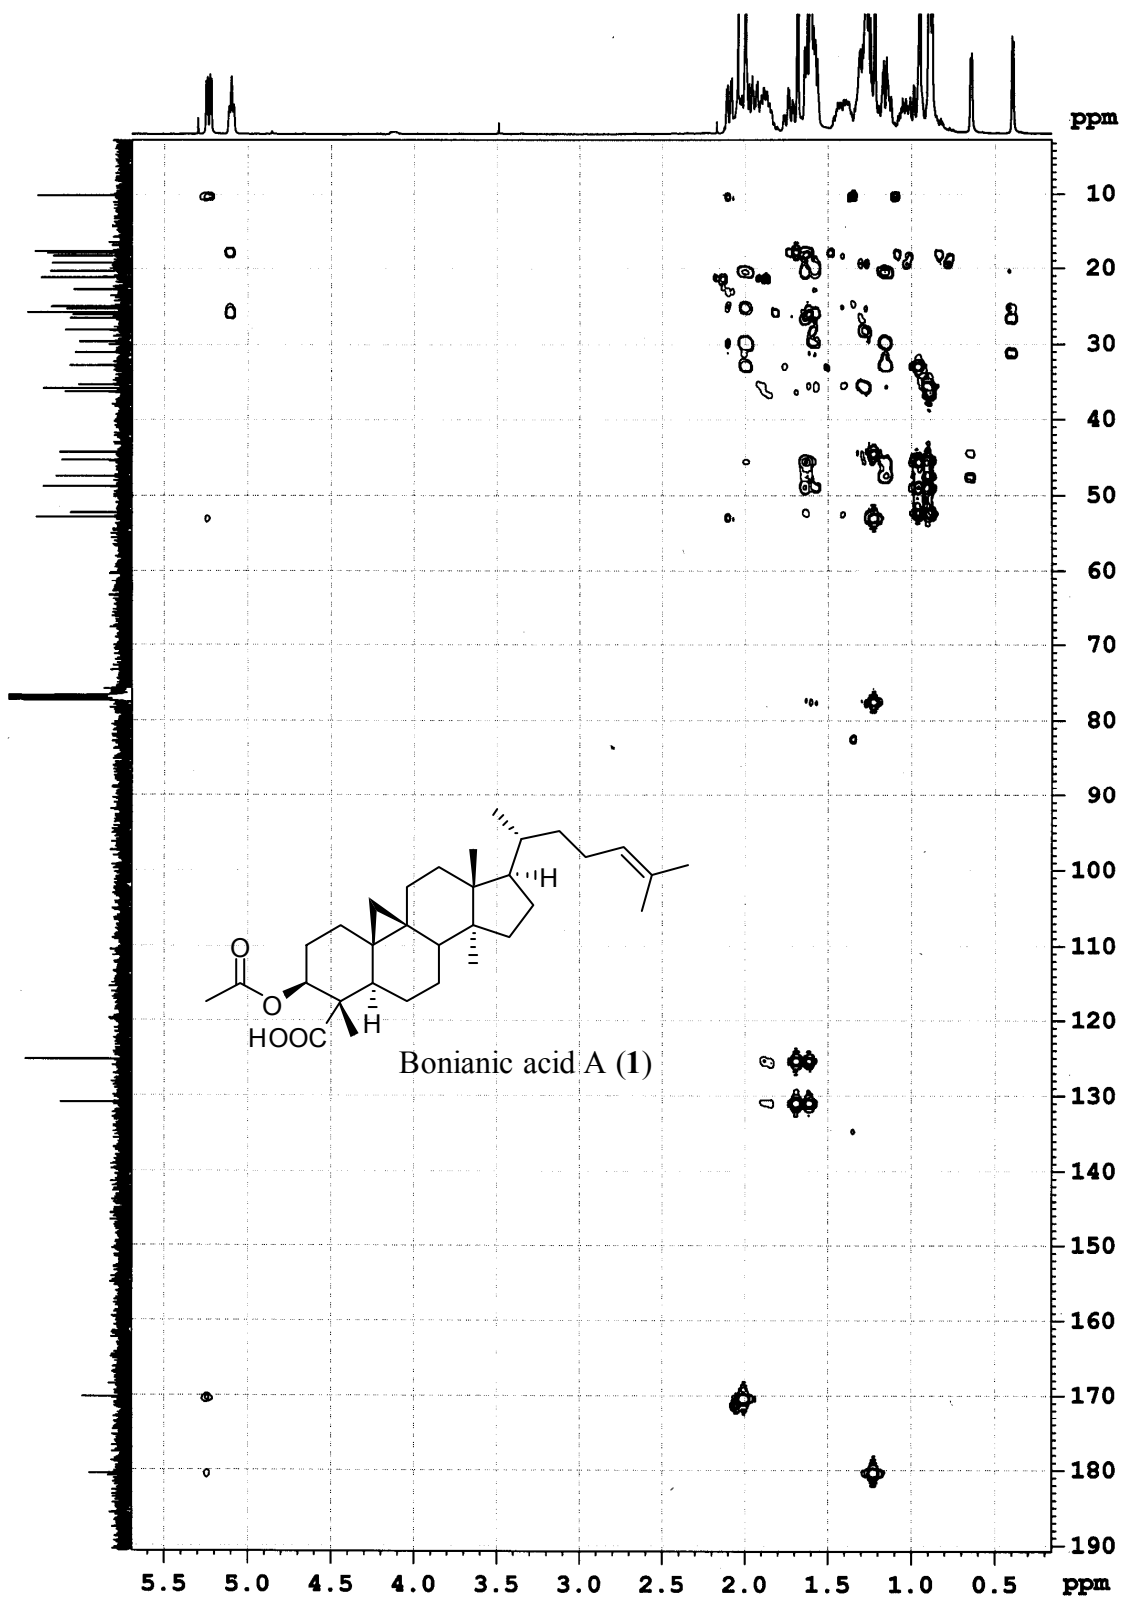

# NOESY spectrum (500.13 MHz, CDCl<sub>3</sub>) of bonianic acid A (1)

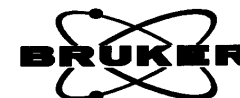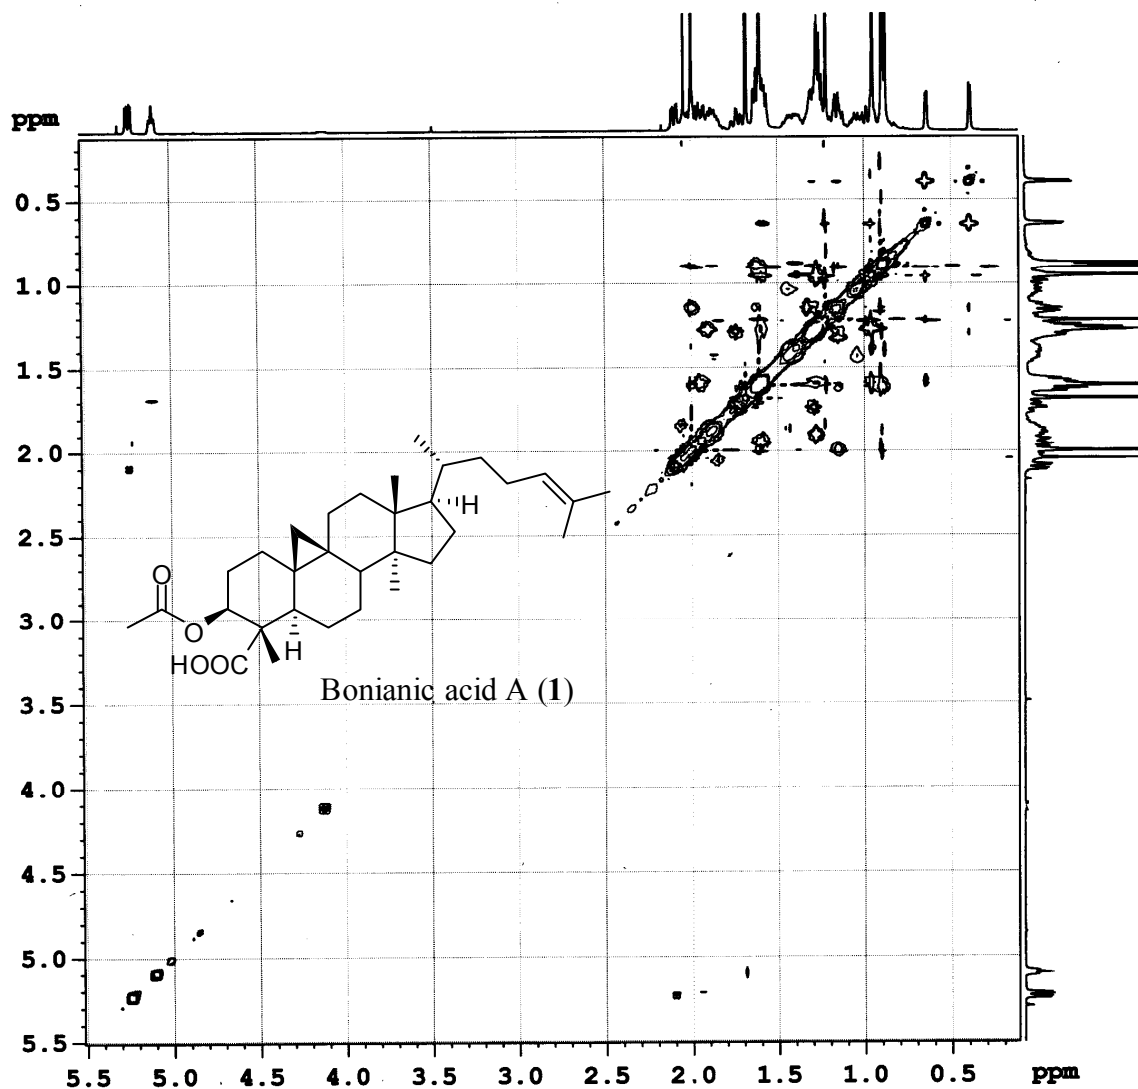

Current Data Parameters  
 NAME 2L.HUNG\_RaderF11973  
 EXPNO 6  
 PROCNO 1

F2 - Acquisition Parameters  
 Date\_ 20070721  
 Time\_ 23.13  
 INSTRUM av500  
 PROBHD 5 mm Multinucl  
 PULPROG noesyph  
 TD 2048  
 SOLVENT CDCl3  
 NS 48  
 DS 4  
 SWH 4006.410 Hz  
 FIDRES 1.956255 Hz  
 AQ 0.2557652 sec  
 RG 181  
 DW 124.800 usec  
 DE 6.00 usec  
 TE 300.0 K  
 d0 0.0001160 sec  
 D1 2.0000000 sec  
 D8 0.34999999 sec  
 INQ 0.00024994 sec  
 MCREST 0.00000000 sec  
 MCWRK 1.00000000 sec  
 STICNT 128

----- CHANNEL f1 -----  
 NUC1 1H  
 P1 10.50 usec  
 PL1 -3.00 dB  
 SF01 500.1318005 MHz

F1 - Acquisition parameters  
 NDO 1  
 TD 256  
 SF01 500.1323 MHz  
 FIDRES 15.628907 Hz  
 SW 8.000 ppm  
 FhMODE States-TPPI

F2 - Processing parameters  
 SI 1024  
 SF 500.1300103 MHz  
 WDW QSINE  
 SSB 2  
 LB 0.00 Hz  
 GB 0  
 PC 1.00

F1 - Processing parameters  
 SI 1024  
 MC2 States-TPPI  
 SF 500.1305148 MHz  
 WDW QSINE  
 SSB 2  
 LB 0.00 Hz  
 GB 0

# Positive HRESI mass spectrum of bonianic acid A (1)

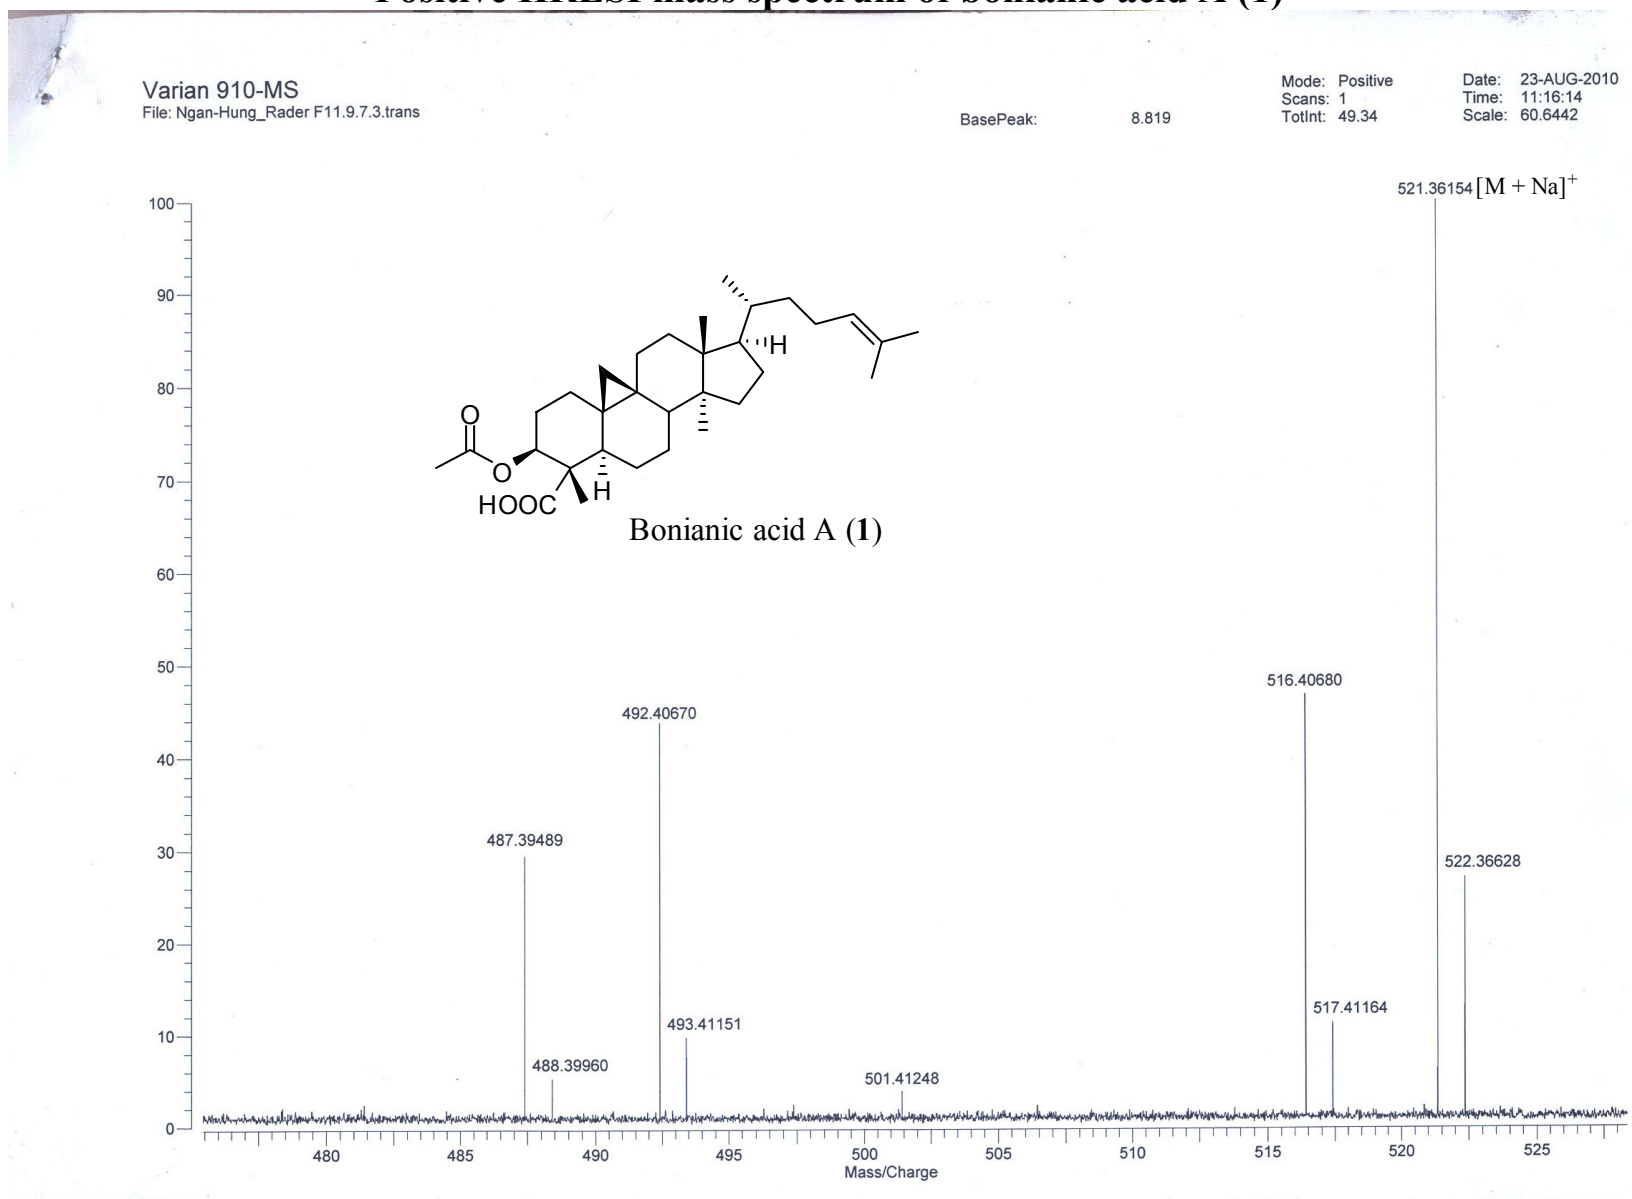

<sup>1</sup>H NMR spectrum (500.13 MHz, CDCl<sub>3</sub>) of bonianic acid B (2)

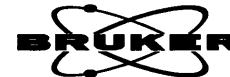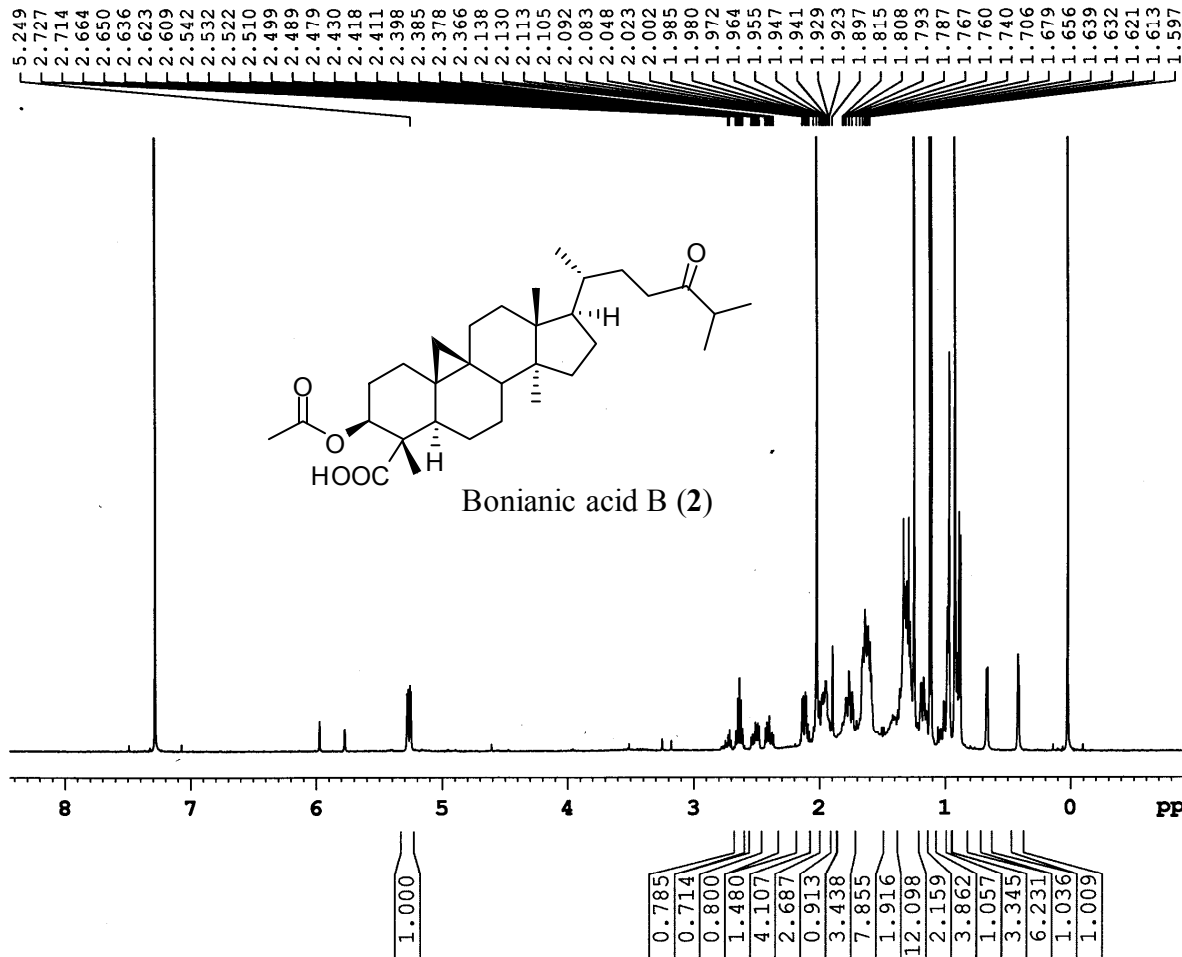

Current Data Parameters  
 NAME 2LUONGHUNG\_Raderf11974  
 EXPNO 1  
 PROCNO 1

F2 - Acquisition Parameters  
 Date\_ 20070710  
 Time 9.47  
 INSTRUM av500  
 PROBHD 5 mm Multinucl  
 PULPROG zg30  
 TD 65536  
 SOLVENT CDCl3  
 NS 16  
 DS 0  
 SWH 10000.000 Hz  
 FIDRES 0.152588 Hz  
 AQ 3.2769001 sec  
 RG 256  
 DW 50.000 usec  
 DE 6.00 usec  
 TE 300.8 K  
 D1 1.00000000 sec  
 MCREST 0.00000000 sec  
 MCWRK 0.01500000 sec

----- CHANNEL f1 -----  
 NUC1 1H  
 P1 10.50 usec  
 PL1 -3.00 dB  
 SFO1 500.1335009 MHz

F2 - Processing parameters  
 SI 32768  
 SF 500.1300011 MHz  
 WDW EM  
 SSB 0  
 LB 0.30 Hz  
 GB 0  
 PC 1.00

<sup>13</sup>C NMR and DEPT spectra (125.76 MHz, CDCl<sub>3</sub>) of bonianic acid B (2)

DEPT90

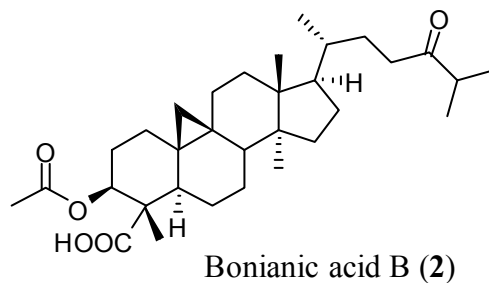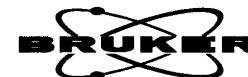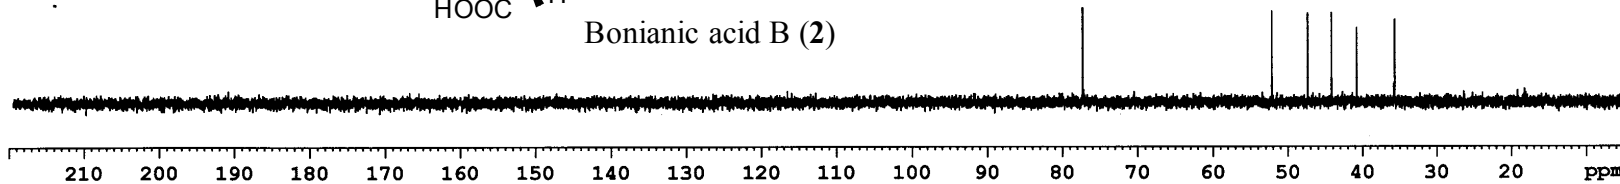

DEPT135

*CH&CH<sub>3</sub>*

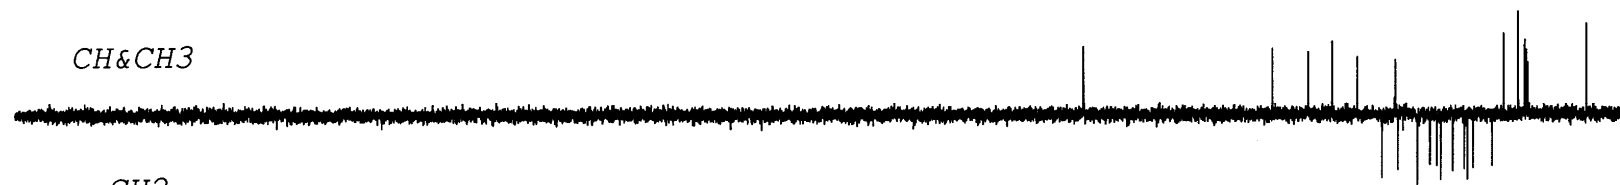

*CH<sub>2</sub>*

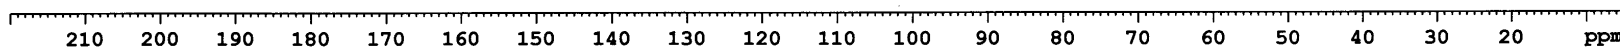

C13CPD

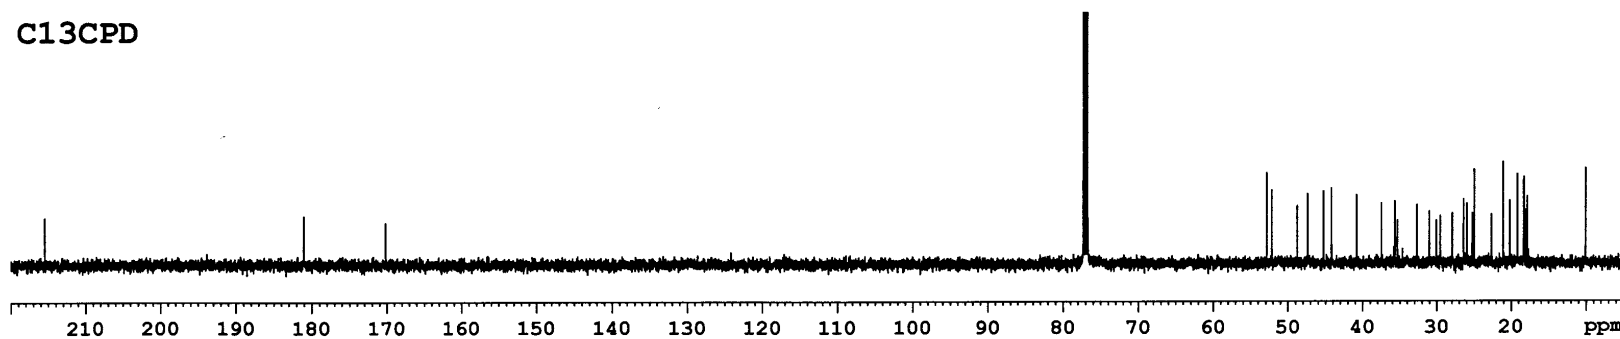

$^1\text{H}$ - $^1\text{H}$  COSY spectrum (500.13 MHz,  $\text{CDCl}_3$ ) of bonianic acid B (2)

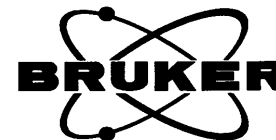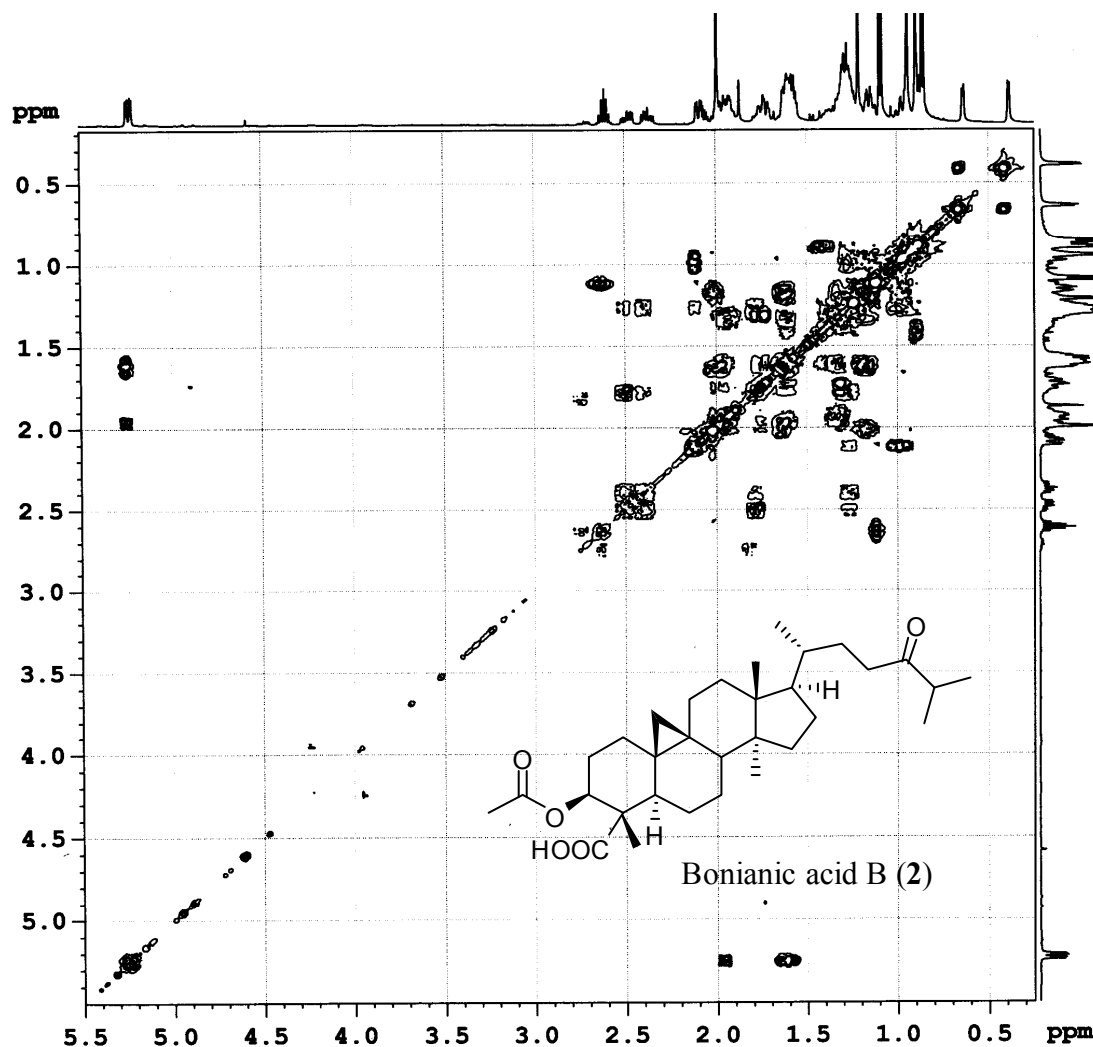

Current Data Parameters  
NAME 2LUONGHUNG.F11974  
EXPNO 5  
PROCNO 1

F2 - Acquisition Parameter  
Date\_ 20071018  
Time 9.30  
INSTRUM av500  
PROBHD 5 mm Multinucl  
PULPROG cosygpqf  
TD 2048  
SOLVENT  $\text{CDCl}_3$   
NS 4  
DS 8  
SWH 5000.000 Hz  
FIDRES 2.441406 Hz  
AQ 0.2049500 se  
RG 114  
DW 100.000 us  
DE 6.00 us  
TE 300.0 K  
d0 0.00000300 se  
D1 1.48689198 se  
d13 0.00000400 se  
D16 0.00015000 se  
IN0 0.00020000 se  
MCREST 0.00000000 se  
MCWRK 1.48689198 se

----- CHANNEL f1 -----  
NUC1 1H  
P0 10.50 us  
P1 10.50 us  
PL1 -3.00 dB  
SFO1 500.1322506 MHz

----- GRADIENT CHANNEL -----  
GPNAM1 SINE.100  
GPNAM2 SINE.100  
GPX1 0.00 %  
GPX2 0.00 %  
GPY1 0.00 %  
GPY2 0.00 %  
GPZ1 10.00 %  
GPZ2 10.00 %  
P16 1000.00 us

F1 - Acquisition parameter  
ND0 1  
TD 256  
SFO1 500.1323 MHz  
FIDRES 19.531250 Hz  
SW 9.997 MHz  
FnMODE QF

F2 - Processing parameters  
SI 1024  
SF 500.1300000 MHz  
WDW SINE  
SSB 0  
LB 0.00 Hz  
GB 0  
PC 1.40

HSQC spectrum ( $^1\text{H}$ : 500.13 MHz,  $^{13}\text{C}$ : 125.76 MHz,  $\text{CDCl}_3$ )  
of bonianic acid B (2)

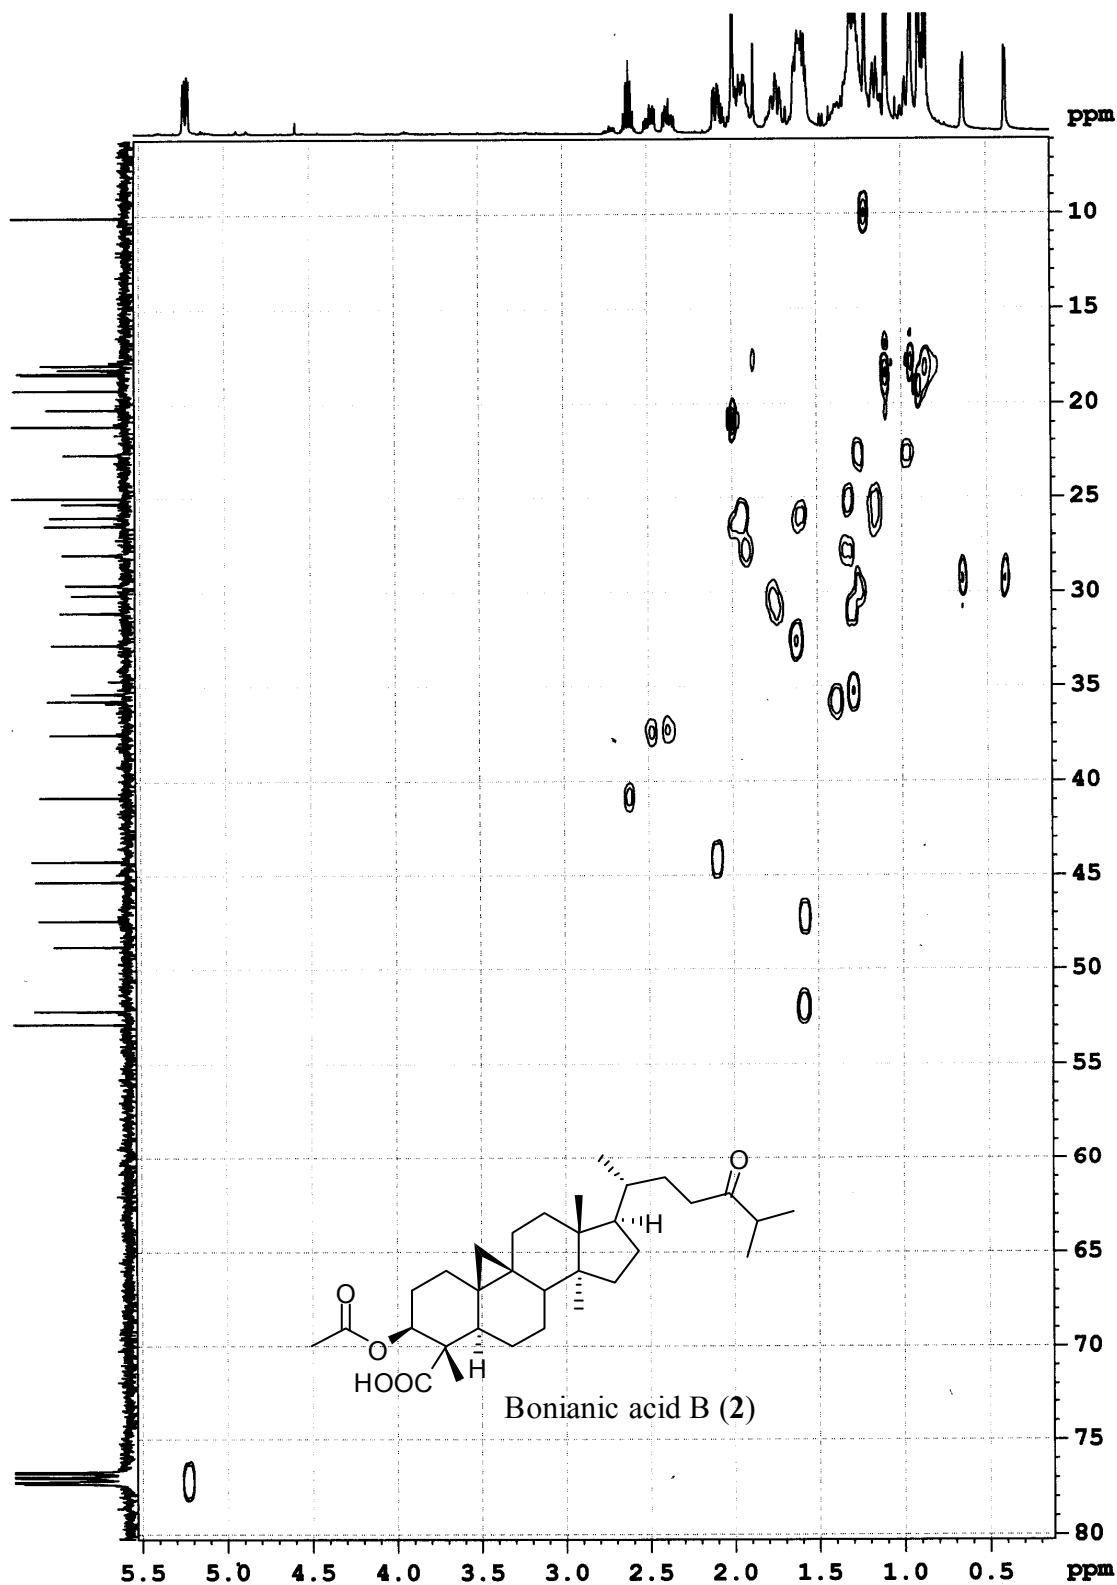

HMBC spectrum ( $^1\text{H}$ : 500.13 MHz,  $^{13}\text{C}$ : 125.76 MHz,  $\text{CDCl}_3$ )  
of bonianic acid B (2)

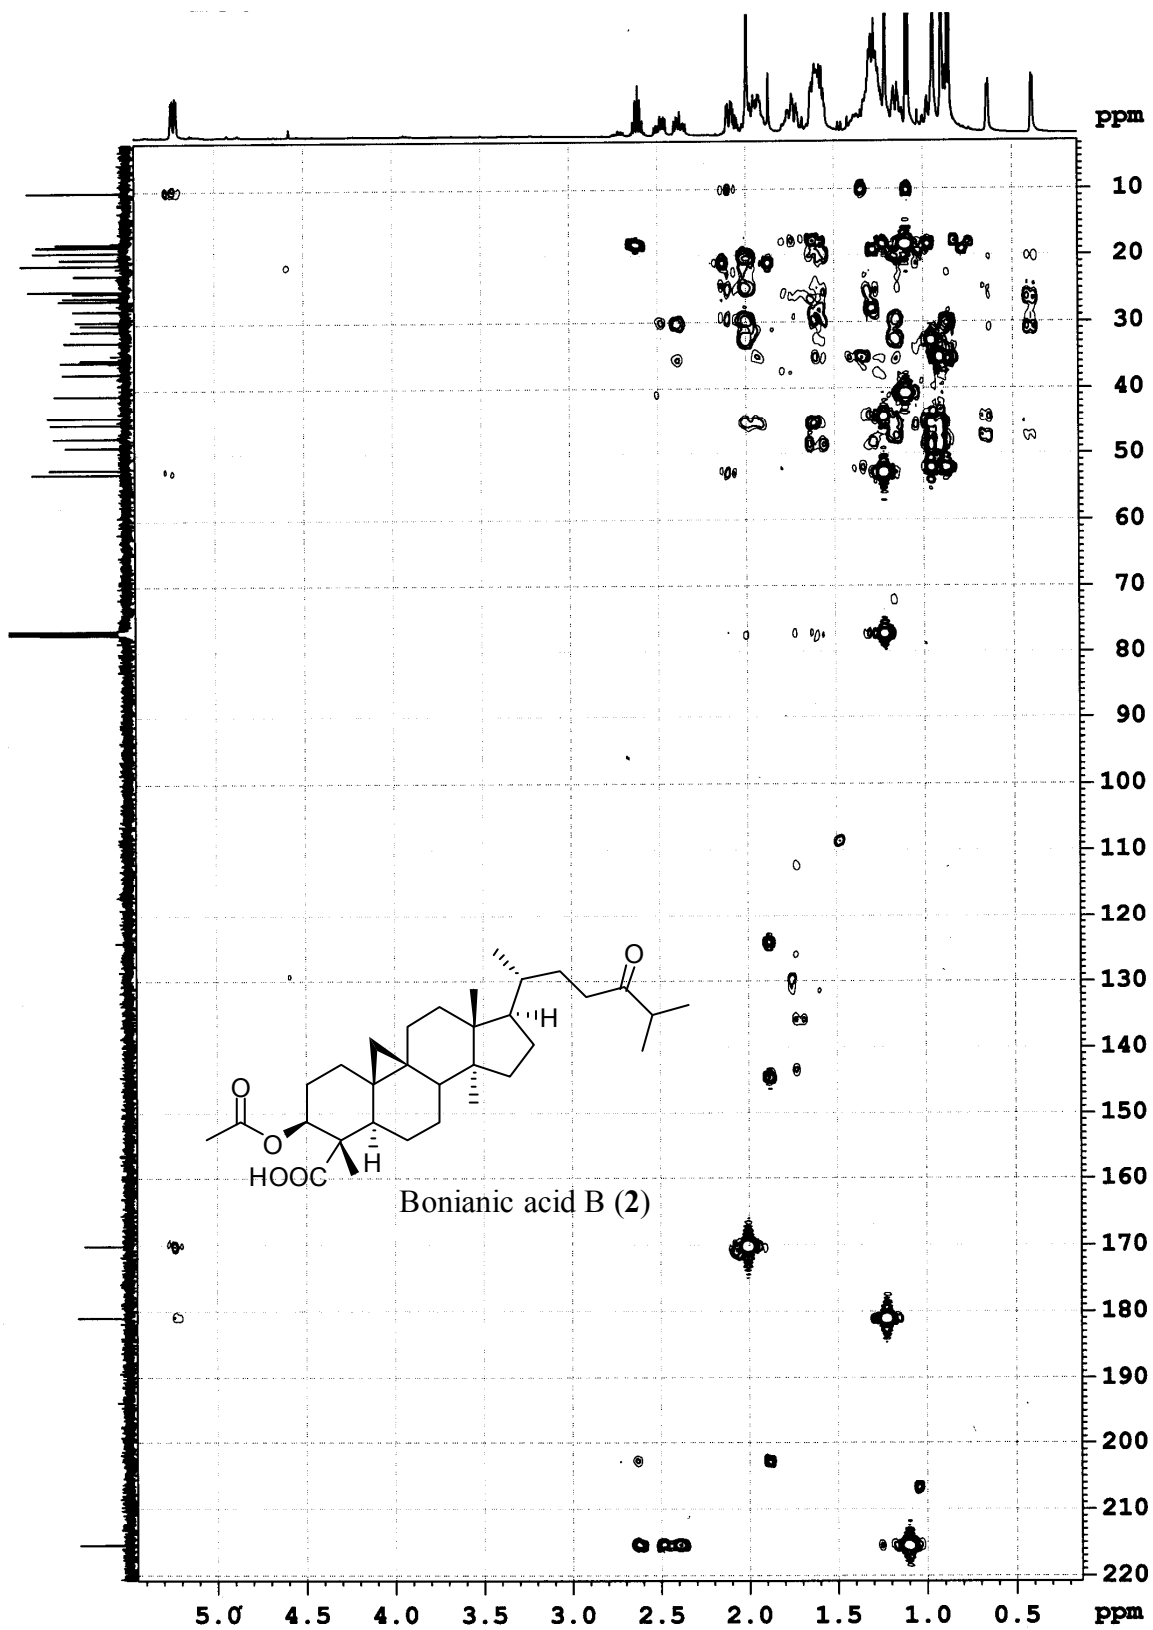



# NOESY spectrum (500.13 MHz, CDCl<sub>3</sub>) of bonianic acid B (2)

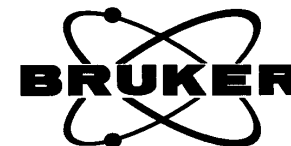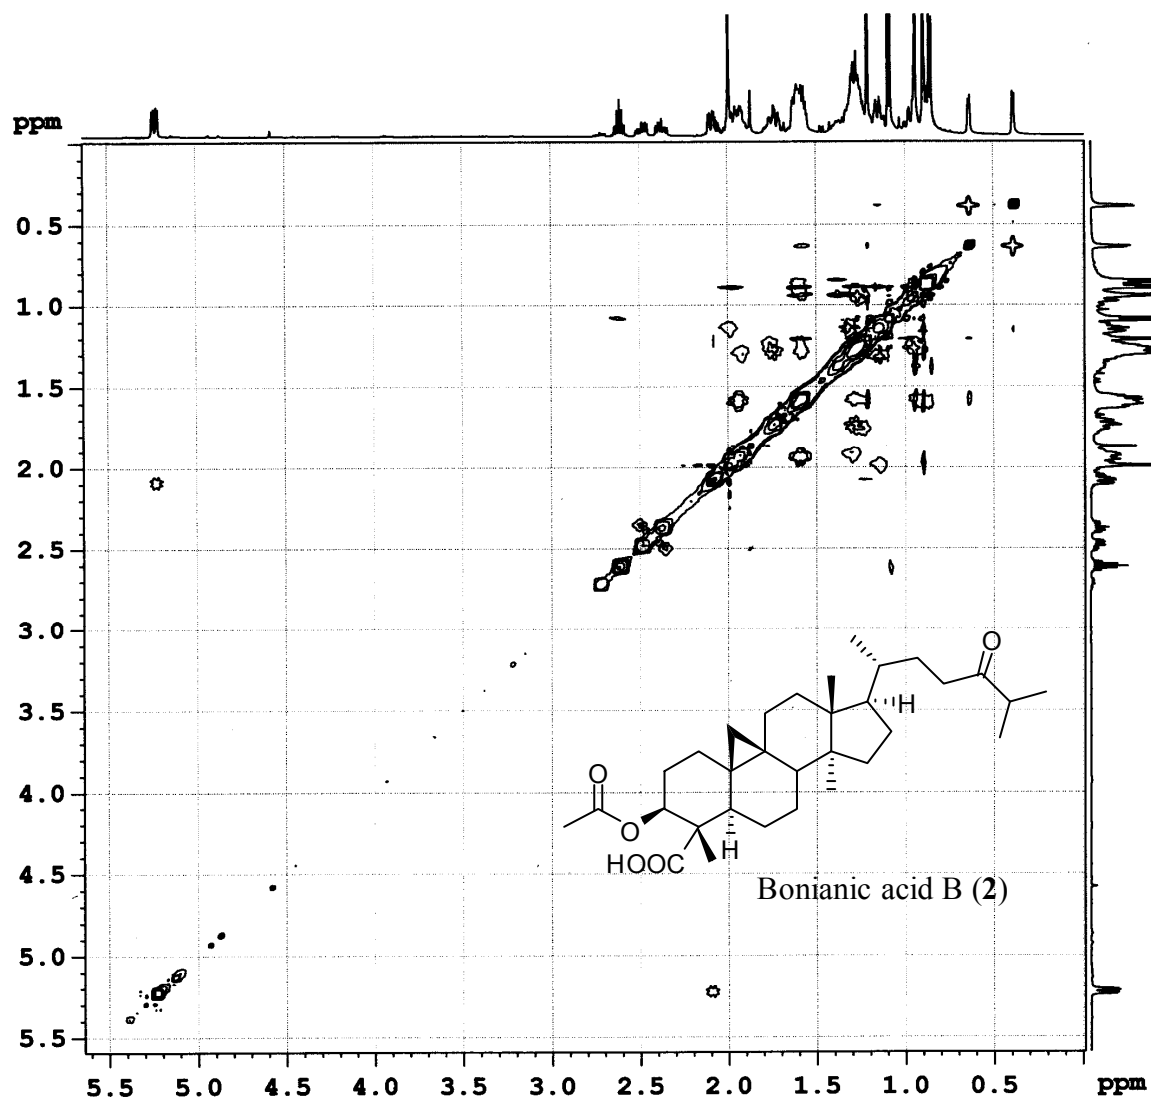

Current Data Parameters  
 NAME 2LUONGHUNG.F11974  
 EXNO 8  
 PROCNO 1

F2 - Acquisition Parameters  
 Date\_ 20071018  
 Time\_ 12.00  
 INSTRUM av500  
 PROBHD 5 mm Multinucl  
 PULPROG noesyph  
 TD 2048  
 SOLVENT CDCl3  
 NS 16  
 DS 4  
 SWH 4496.403 Hz  
 FIDRES 2.195509 Hz  
 AQ 0.2278988 sec  
 RG 35.9  
 DW 111.200 usec  
 DE 6.00 usec  
 TE 300.0 K  
 d0 0.00009771 sec  
 D1 1.50000000 sec  
 D8 0.80000001 sec  
 INO 0.00022216 sec  
 MCREST 0.00000000 sec  
 MCWRK 0.75000000 sec  
 ST1CNT 128

----- CHANNEL f1 -----  
 NUC1 1H  
 P1 10.50 usec  
 PL1 -3.00 dB  
 SFO1 500.1320005 MHz

F1 - Acquisition parameters  
 NDO 1  
 TD 222  
 SFO1 500.1323 MHz  
 FIDRES 20.275719 Hz  
 SW 9.000 ppm  
 FnMODE States-TPPI

F2 - Processing parameters  
 SI 1024  
 SF 500.1300127 MHz  
 WDW QSINE  
 SSB 2  
 LB 0.00 Hz  
 GB 0  
 PC 1.00

F1 - Processing parameters  
 SI 1024  
 MC2 States-TPPI  
 SF 500.1303150 MHz  
 WDW QSINE  
 SSB 2  
 LB 0.00 Hz  
 GB 0

## Negative HRESI mass spectrum of bonianic acid B (2)

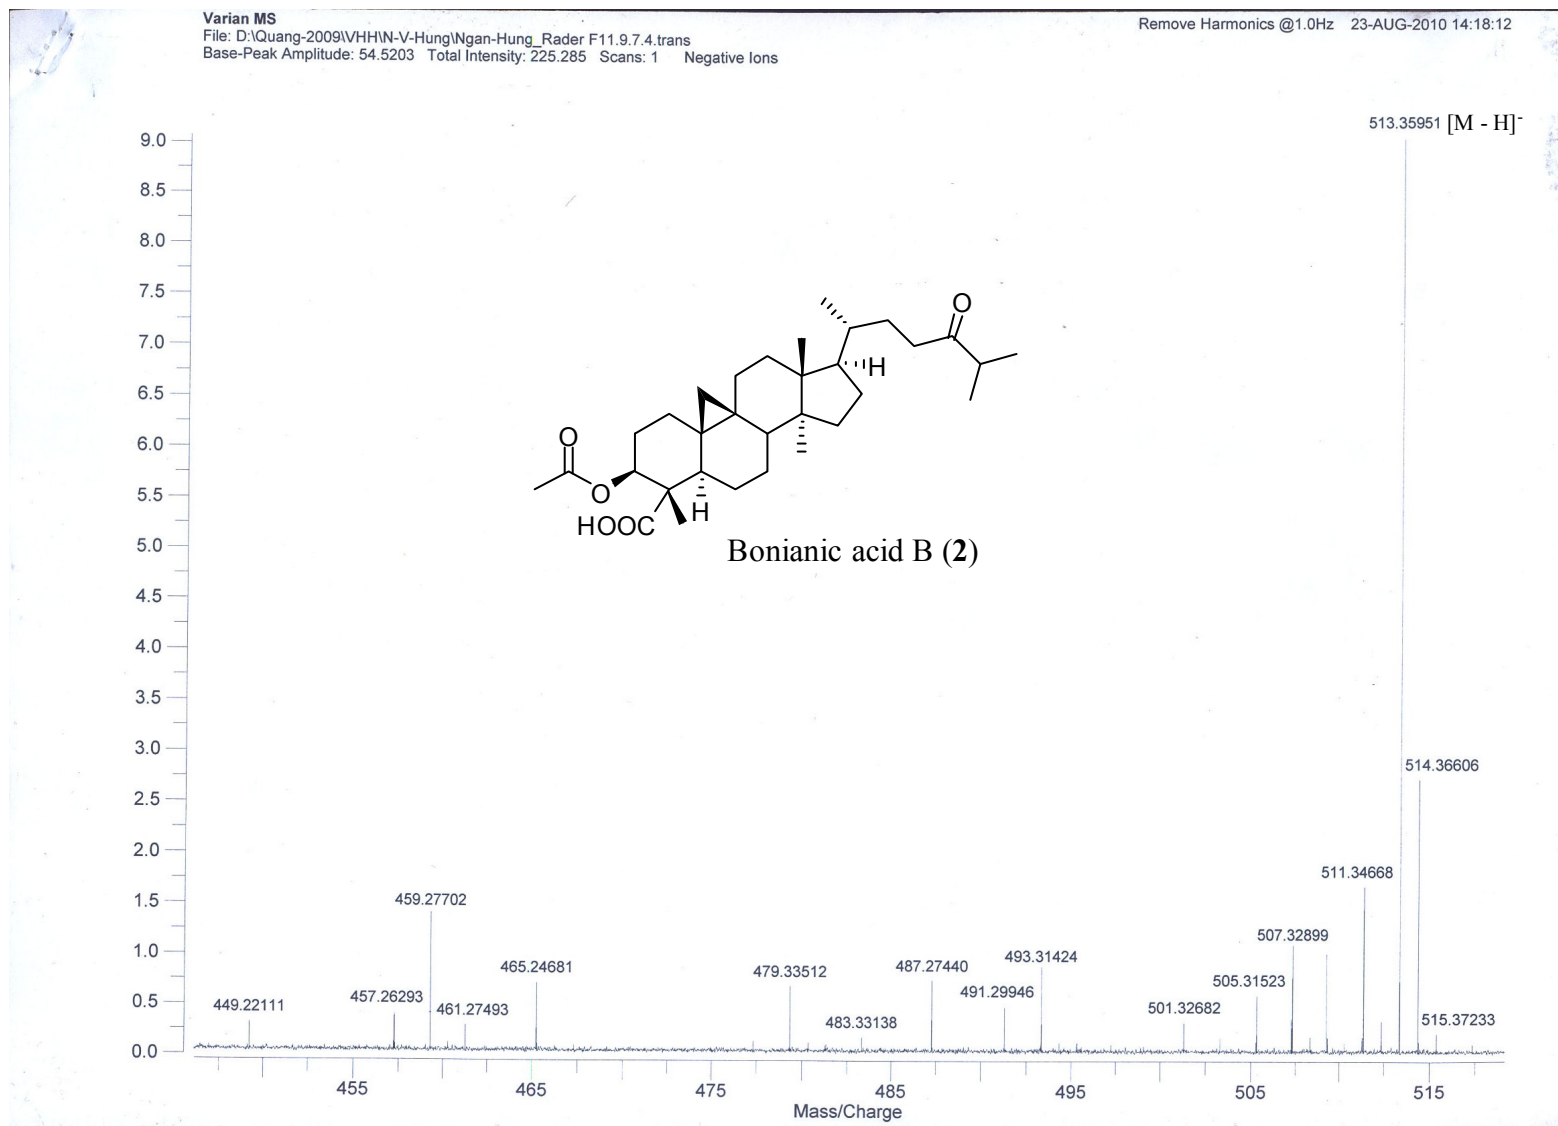

<sup>1</sup>H NMR spectrum (500.13 MHz, CDCl<sub>3</sub>) of 3-O-acetylluncaric acid (3)

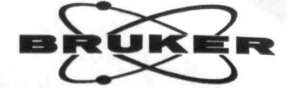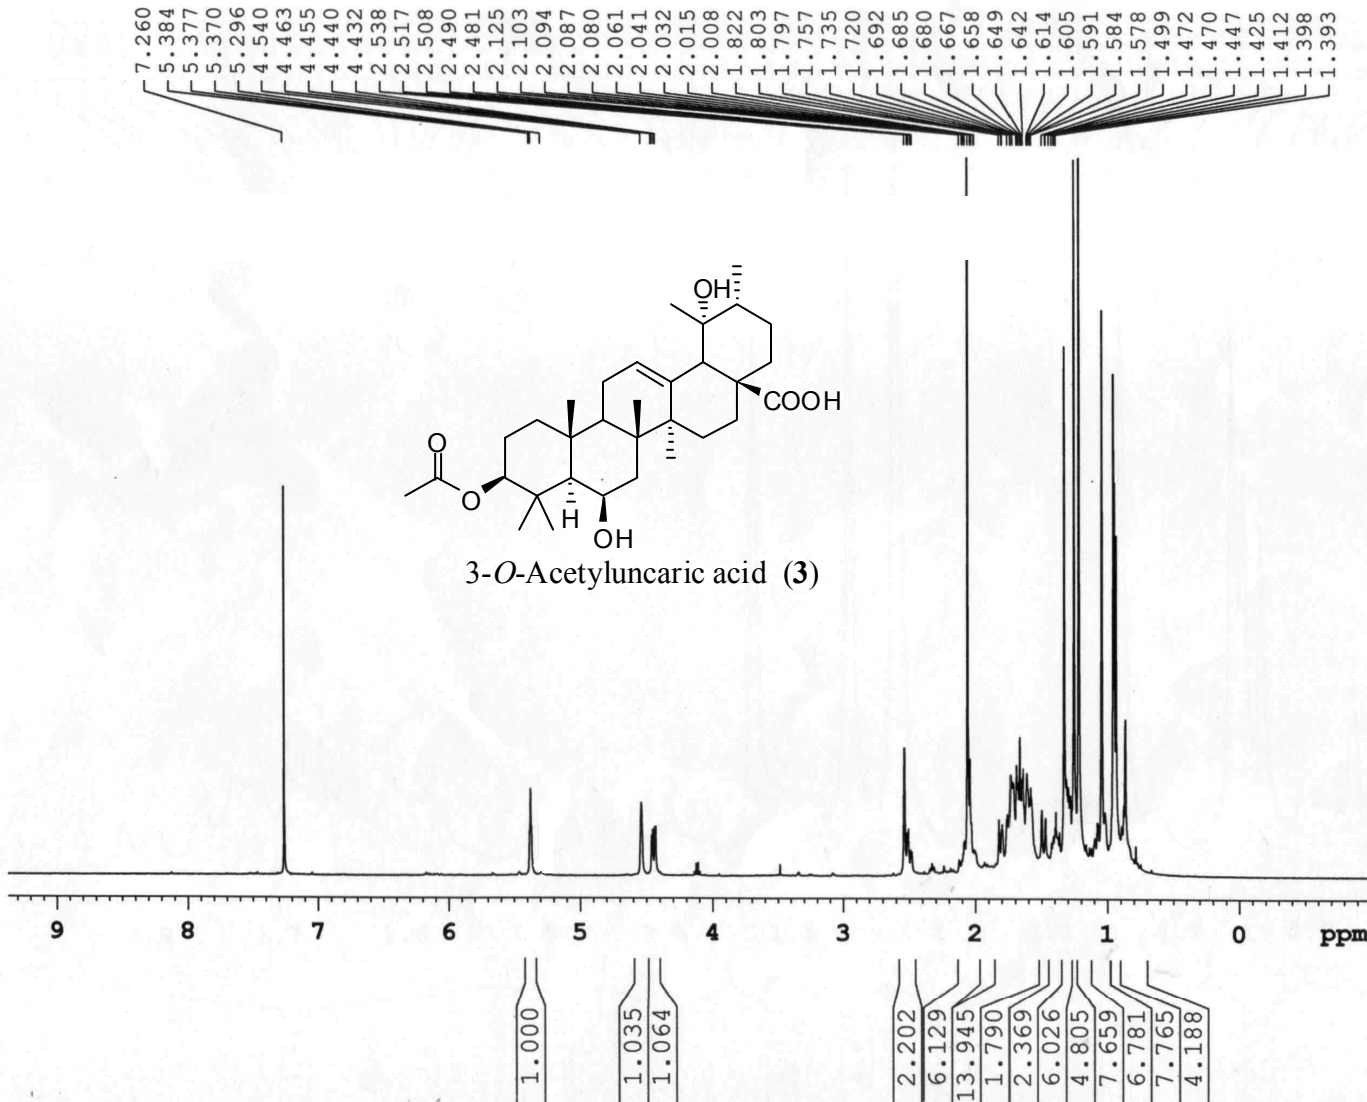

Current Data Parameters  
NAME 2NGANHUNG.RADERF62  
EXPNO 1  
PROCNO 1

F2 - Acquisition Parameters  
Date\_ 20090811  
Time\_ 9.58  
INSTRUM av500  
PROBHD 5 mm Multinucl  
PULPROG zg30  
TD 65536  
SOLVENT CDCl3  
NS 16  
DS 0  
SWH 10000.000 Hz  
FIDRES 0.152588 Hz  
AQ 3.2769001 sec  
RG 181  
DW 50.000 usec  
DE 6.00 usec  
TE 301.1 K  
D1 1.00000000 sec  
MCREST 0.00000000 sec  
MCWRK 0.01500000 sec

===== CHANNEL f1 =====  
NUC1 1H  
P1 10.50 usec  
PL1 -3.00 dB  
SFO1 500.1323037 MHz

F2 - Processing parameters  
SI 32768  
SF 500.1300134 MHz  
WDW EM  
SSB 0  
LB 0.30 Hz  
GB 0  
PC 1.00

**$^{13}\text{C}$  NMR and DEPT spectra (125.76 MHz,  $\text{CDCl}_3$ ) of 3-*O*-acetyluncaric acid (3)**

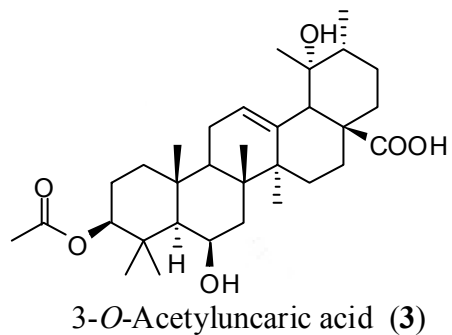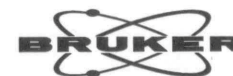

DEPT90

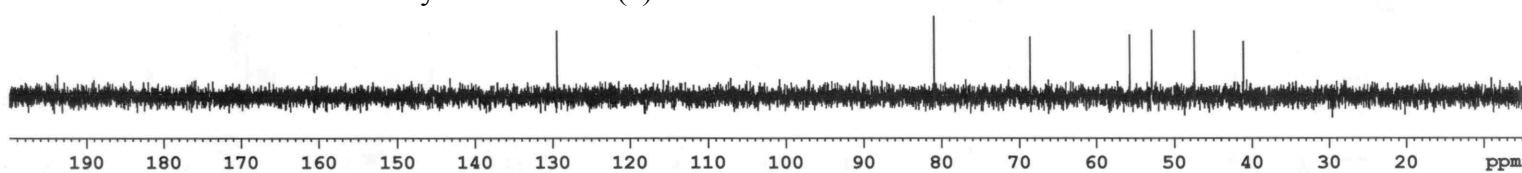

DEPT135

*CH&CH<sub>3</sub>*

*CH<sub>2</sub>*

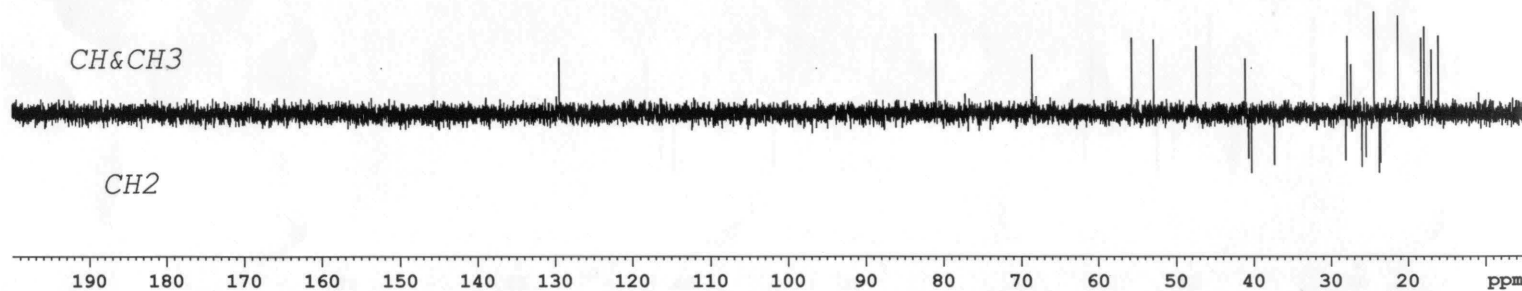

C13CPD

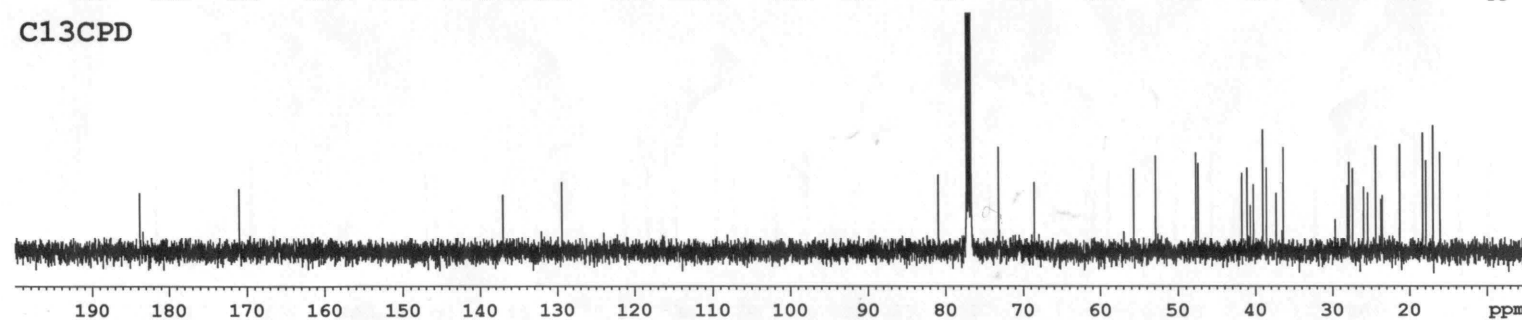

$^1\text{H}$ - $^1\text{H}$  COSY spectrum (500.13 MHz,  $\text{CDCl}_3$ ) of 3-*O*-acetylluncaric acid (3)

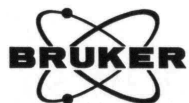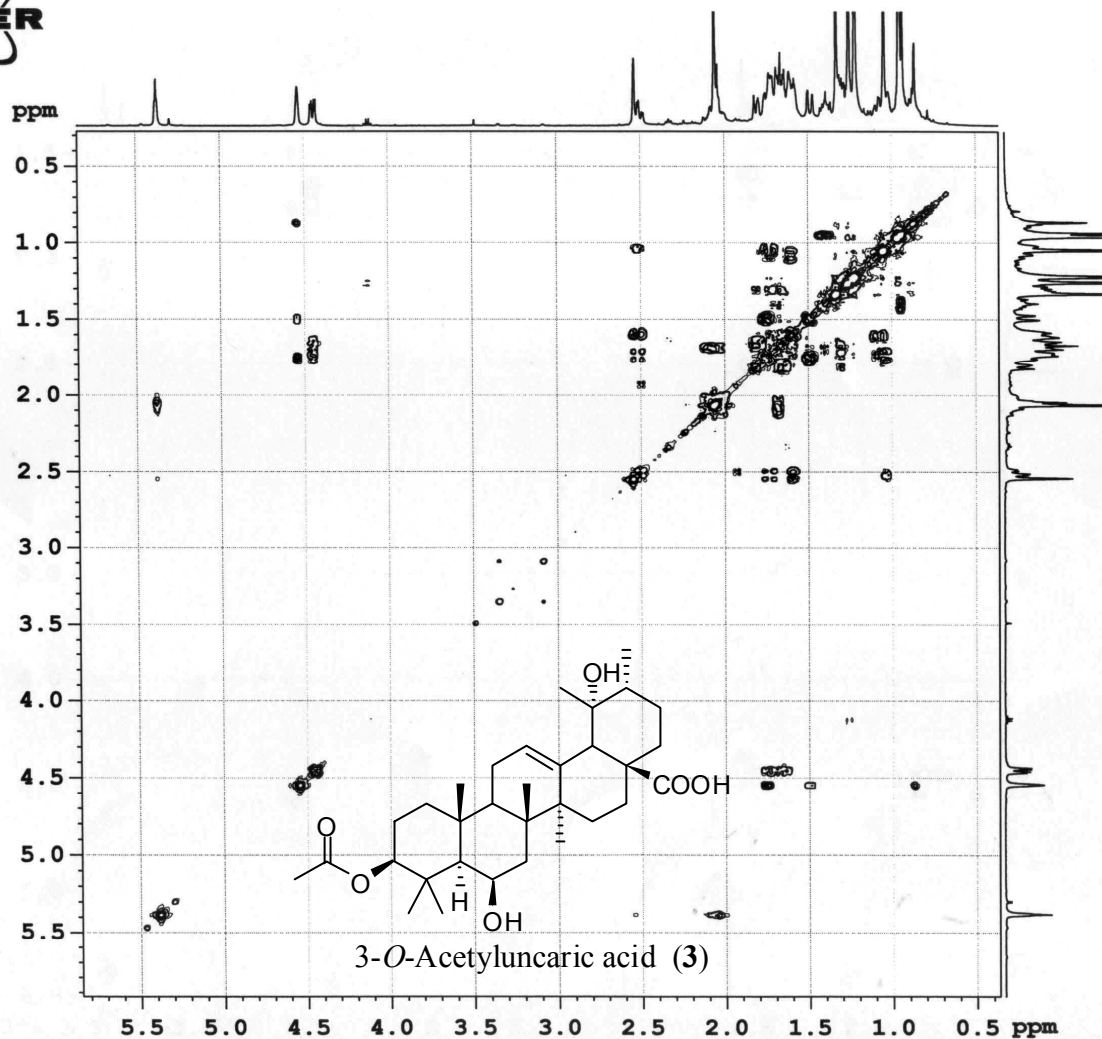

Current Data Parameters  
 NAME ZNGANHUNG.RADERF62  
 EXPNO 5  
 PROCNO 1

F2 - Acquisition Parameters  
 Date 20090826  
 Time 17.16  
 INSTRUM av500  
 PROBHD 5 mm Multinucl  
 PULPROG cosygpgf  
 TD 2048  
 SOLVENT  $\text{CDCl}_3$   
 NS 8  
 DS 8  
 SWH 5000.000 Hz  
 FIDRES 2.441406 Hz  
 AQ 0.2049500 sec  
 RG 203.2  
 DW 100.000 usec  
 DE 6.00 usec  
 TE 302.1 K  
 d0 0.00000300 sec  
 D1 1.48689198 sec  
 d13 0.00000400 sec  
 D16 0.00015000 sec  
 INO 0.00020000 sec  
 MCREST 0.00000000 sec  
 MCWRK 1.48689198 sec

----- CHANNEL f1 -----  
 NUC1 1H  
 P0 10.50 usec  
 P1 10.50 usec  
 PL1 -3.00 dB  
 SFO1 500.1322506 MHz

----- GRADIENT CHANNEL -----  
 GPNAM1 SINE.100  
 GPNAM2 SINE.100  
 GPX1 0.00 %  
 GPX2 0.00 %  
 GPY1 0.00 %  
 GPY2 0.00 %  
 GPZ1 10.00 %  
 GPZ2 10.00 %  
 P16 1000.00 usec

F1 - Acquisition parameters  
 ND0 1  
 TD 256  
 SFO1 500.1323 MHz  
 FIDRES 19.531250 Hz  
 SW 9.997 ppm  
 FMODE QF

F2 - Processing parameters  
 SI 1024  
 SF 500.1300000 MHz  
 WDW SINE  
 SSB 0  
 LB 0.00 Hz  
 GB 0  
 PC 1.40

F1 - Processing parameters  
 SI 1024  
 MC2 QF  
 SF 500.1300000 MHz  
 WDW SINE  
 SSB 0  
 LB 0.00 Hz  
 GB 0

HSQC spectrum ( $^1\text{H}$ : 500.13 MHz,  $^{13}\text{C}$ : 125.76 MHz,  $\text{CDCl}_3$ )  
of 3-*O*-acetylluncaric acid (3)

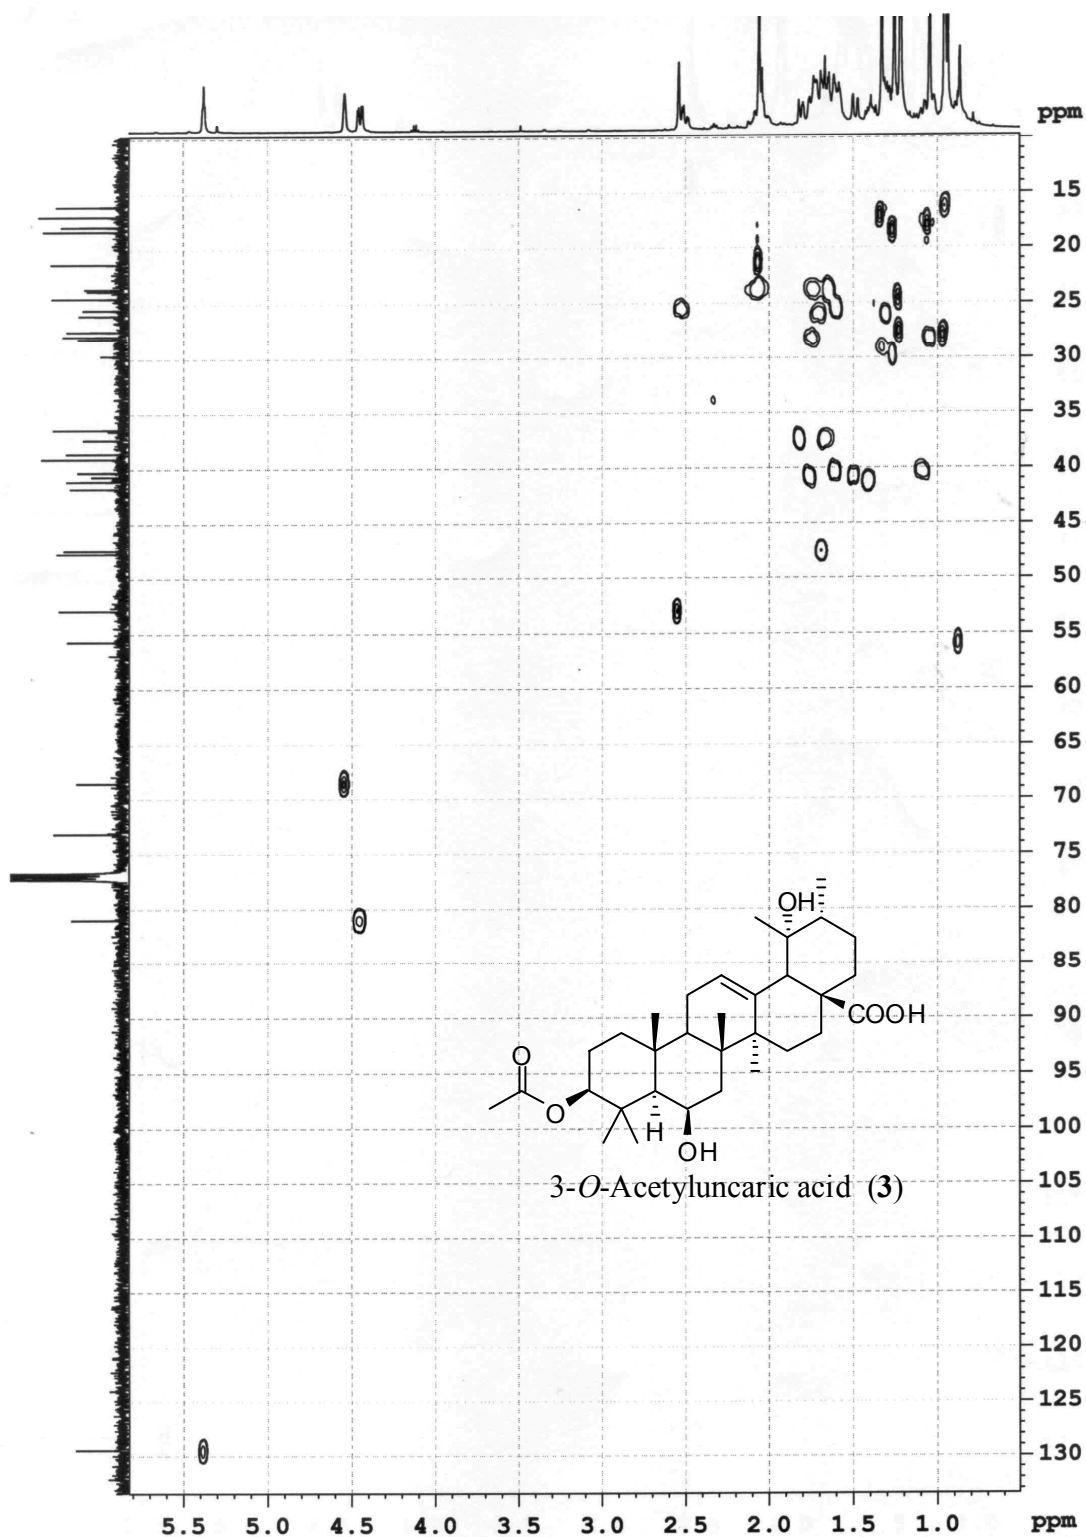

HMBC spectrum ( $^1\text{H}$ : 500.13 MHz,  $^{13}\text{C}$ : 125.76 MHz,  $\text{CDCl}_3$ )  
of 3-*O*-acetyluncaric acid (3)

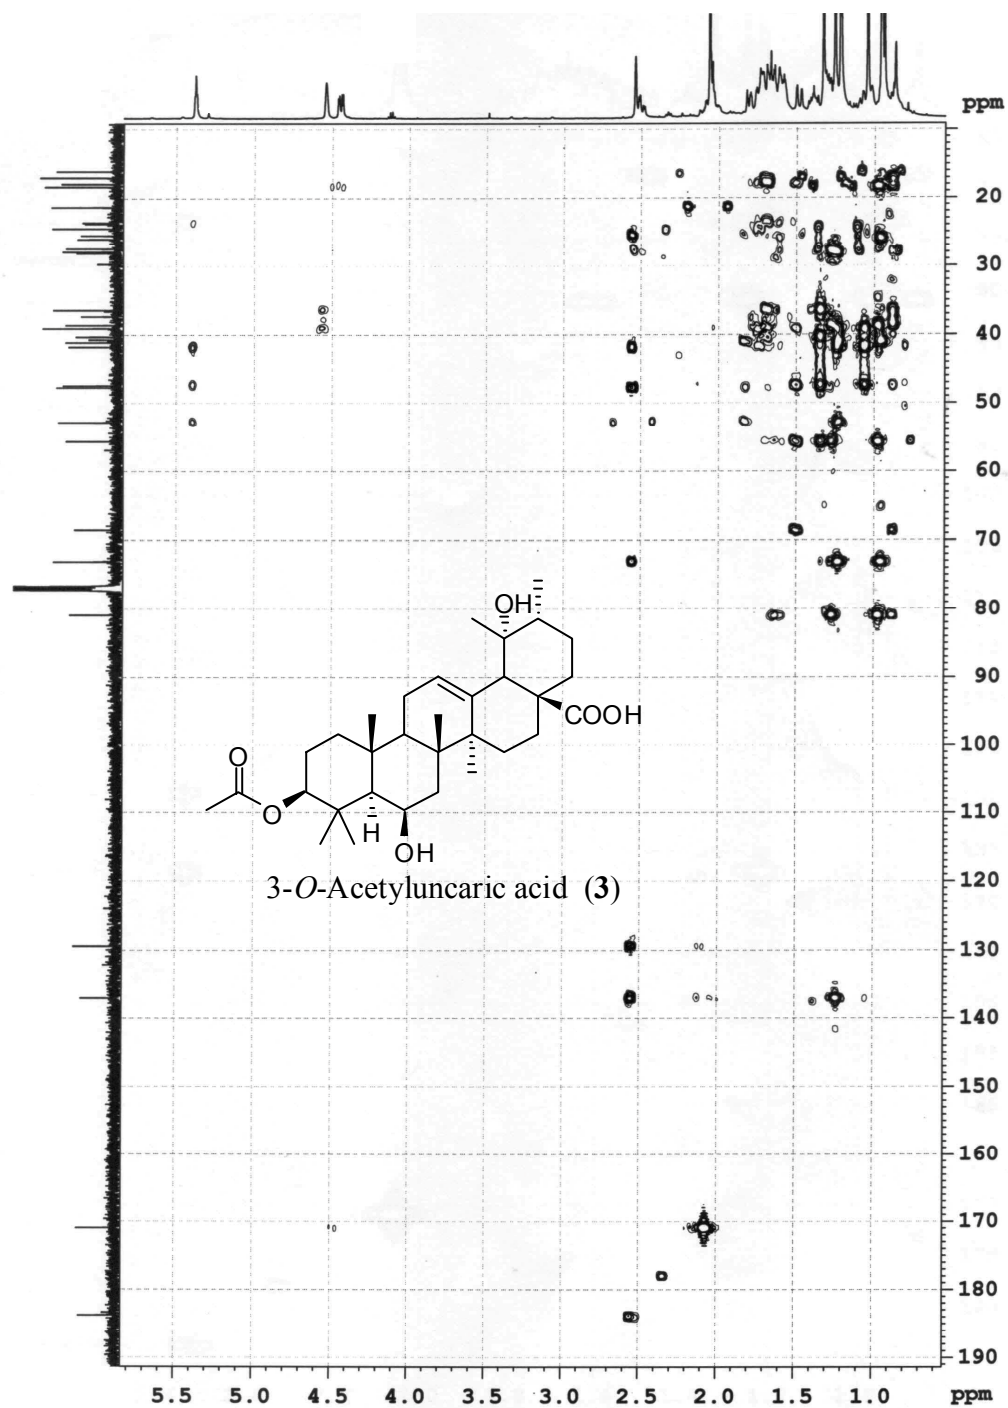

# NOESY spectrum (500.13 MHz, CDCl<sub>3</sub>) of 3-O-acetylluncaric acid (3)

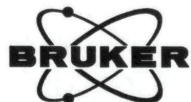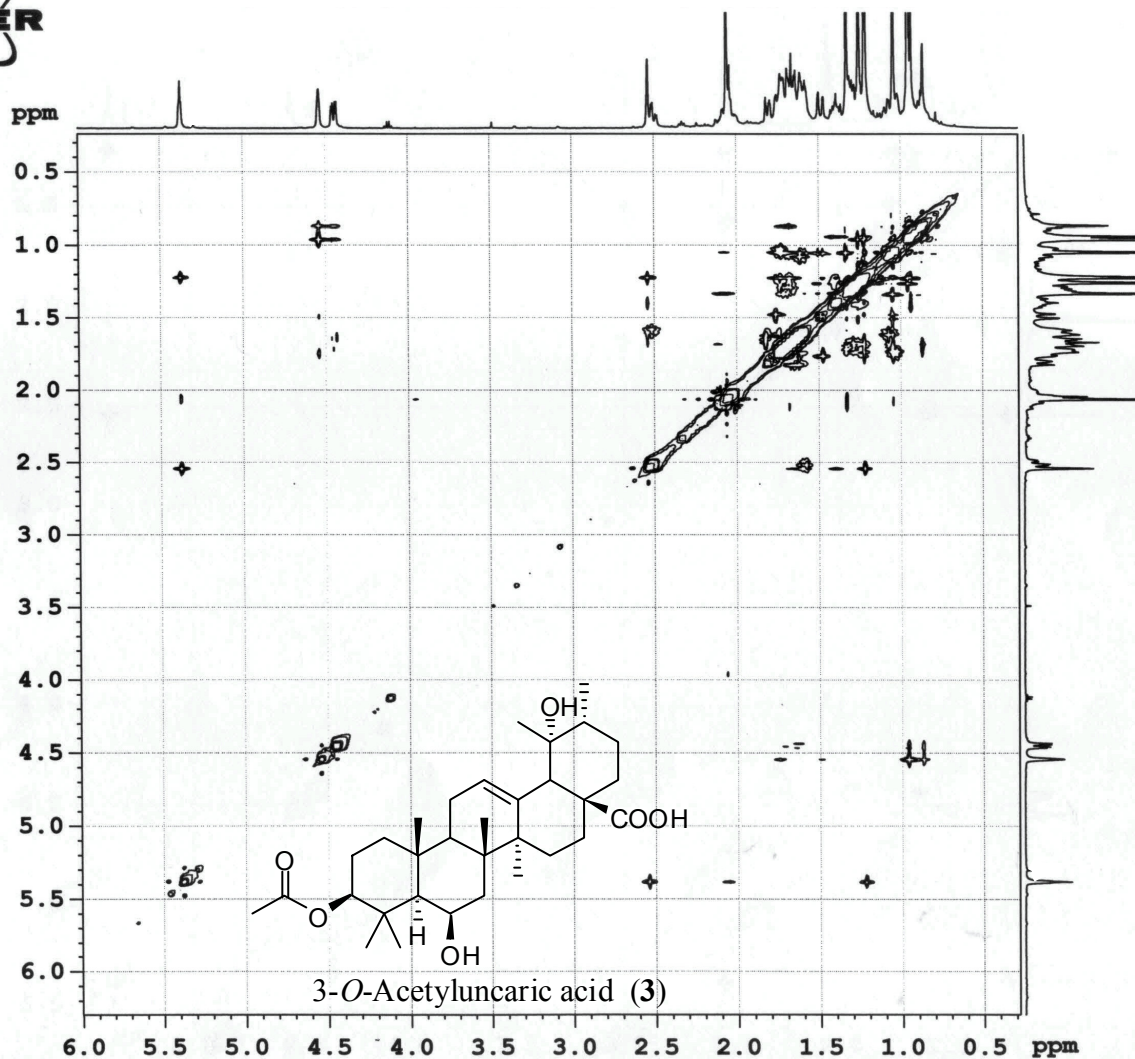

Current Data Parameters  
 NAME 2NGANHUNG.RADERF62  
 EXPNO 8  
 PROCNO 1

F2 - Acquisition Parameters  
 Date\_ 20090827  
 Time\_ 0.44  
 INSTRUM av500  
 PROBHD 5 mm Multinucl  
 PULPROG noesyph  
 TD 2048  
 SOLVENT CDCl3  
 NS 32  
 DS 8  
 SWH 5000.000 Hz  
 FIDRES 2.441406 Hz  
 AQ 0.2049500 sec  
 RG 203.2  
 DW 100.000 usec  
 DE 6.00 usec  
 TE 301.8 K  
 d0 0.00008661 sec  
 D1 1.50000000 sec  
 D8 0.30000001 sec  
 INO 0.00019995 sec  
 MCREST 0.00000000 sec  
 MCWRK 0.75000000 sec  
 ST1CNT 128

----- CHANNEL f1 -----  
 NUC1 1H  
 P1 10.50 usec  
 PL1 -3.00 dB  
 SF01 500.1320005 MHz

F1 - Acquisition parameters  
 NDO 1  
 TD 256  
 SF01 500.1323 MHz  
 FIDRES 19.536135 Hz  
 SW 10.000 ppm  
 FnMODE States-TPPI

F2 - Processing parameters  
 SI 1024  
 SF 500.1300129 MHz  
 WDW QSINE  
 SSB 2  
 LB 0.00 Hz  
 GB 0  
 PC 1.00

F1 - Processing parameters  
 SI 1024  
 MC2 States-TPPI  
 SF 500.1303134 MHz  
 WDW QSINE  
 SSB 2  
 LB 0.00 Hz  
 GB 0



# Positive HRESI mass spectrum of 3-O-acetylluncaric acid (3)

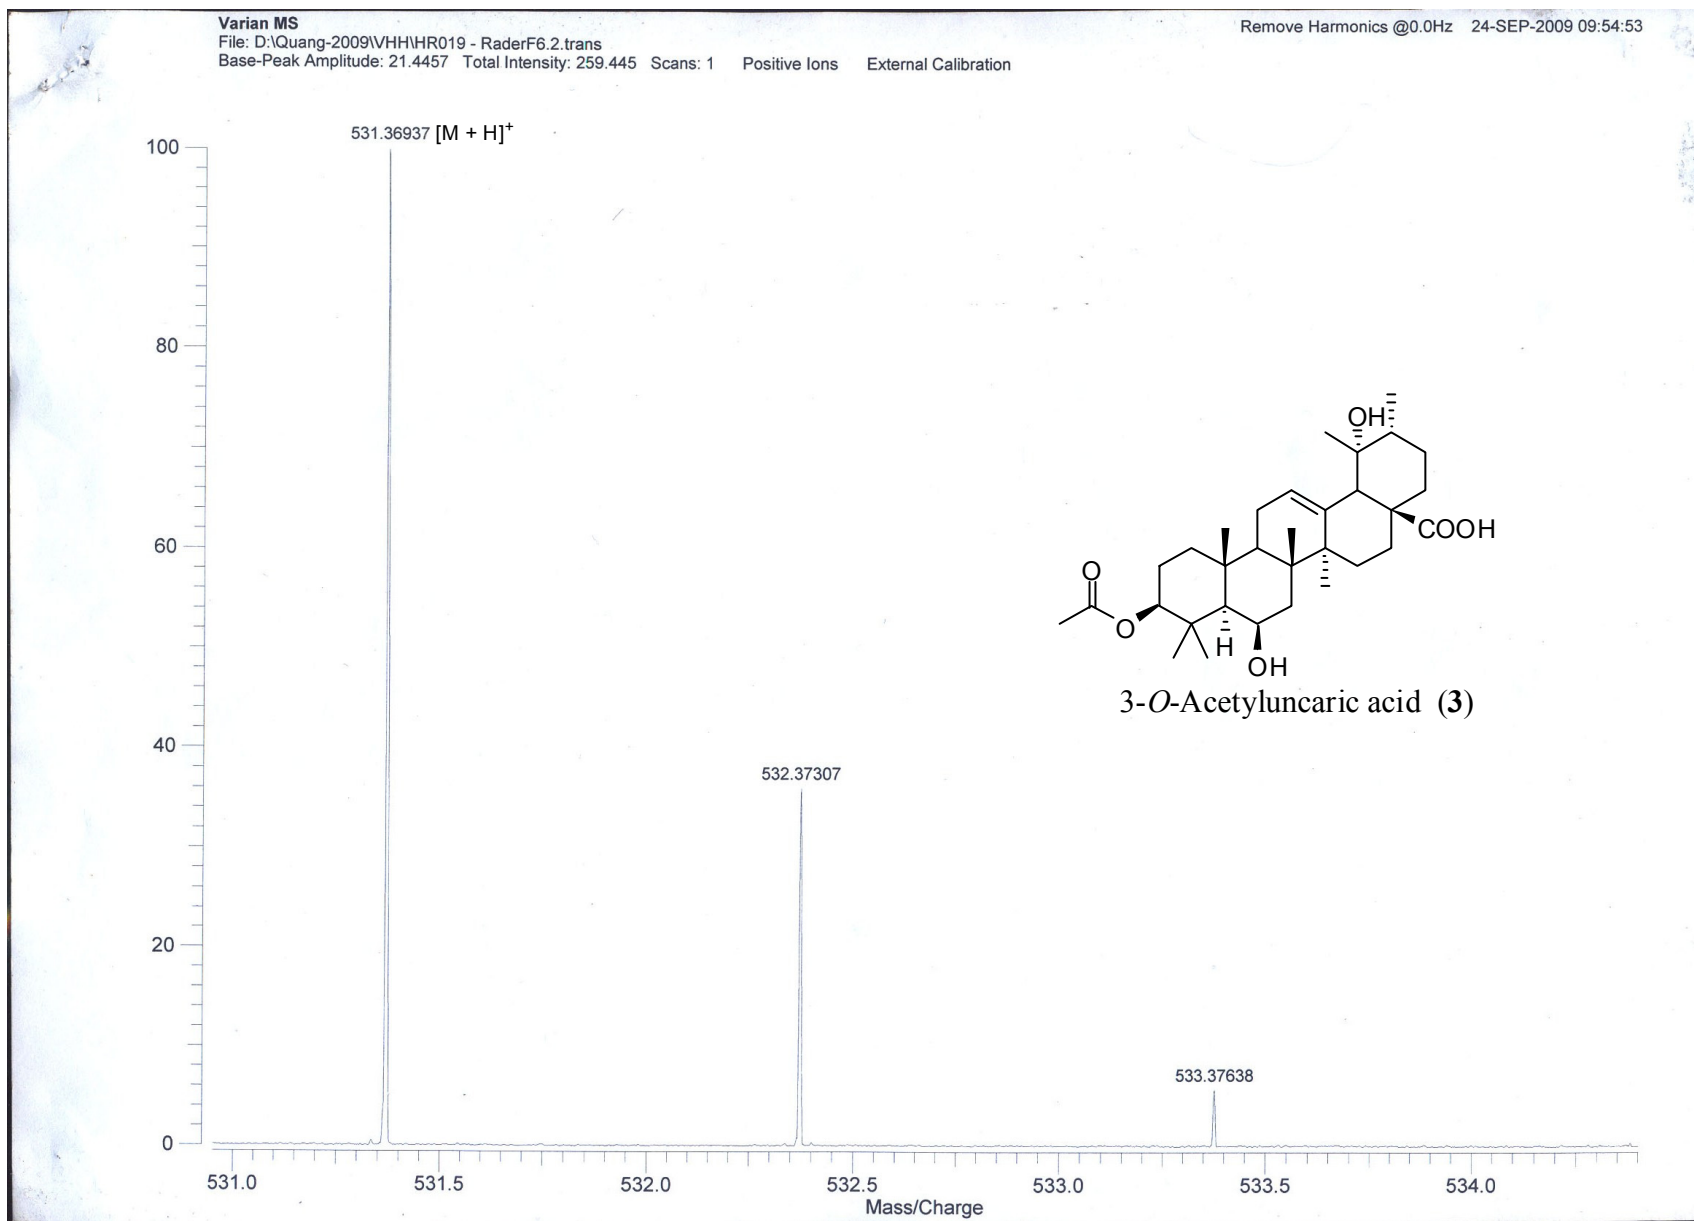

Supplement: NIHMS287113-supplement-1_si_001.pdf [file NIHMS287113-supplement-1_si_001.pdf]
